# 1 (Poly)phenols in Human Breast Milk and their health

## 2 benefits for the newborn

3 Diogo Carregosa<sup>1</sup>, Inês P. Silva<sup>1</sup>, Carolina Teixeira<sup>1</sup>, Mariana Baltazar<sup>1</sup>, Rocio García-Villalba<sup>2</sup>, Filipa  
4 Soares Vieira<sup>3</sup>, Mónica Marçal<sup>1,3</sup>, Madalena Tuna<sup>3,4</sup>, Cláudia N. Santos<sup>1</sup>

5 <sup>1</sup> iNOVA4Health, NOVA Medical School | Faculdade de Ciências Médicas, Universidade NOVA de  
6 Lisboa, Campo dos Mártires da Pátria, 1169-056 Lisboa, Portugal.

7 <sup>2</sup> Laboratory of Food & Health, Research Group on Quality, Safety, and Bioactivity of Plant Foods,  
8 CEBAS-CSIC, Murcia, Spain.

9 <sup>3</sup> Hospital de São Francisco Xavier - Centro Hospitalar de Lisboa ocidental E.P.E.

10 <sup>4</sup> CHRC, NOVA Medical School | Faculdade de Ciências Médicas, Universidade NOVA de Lisboa,  
11 Campo dos Mártires da Pátria, 1169-056 Lisboa, Portugal.

12

13 Corresponding author: [claudia.nunes.santos@nms.unl.pt](mailto:claudia.nunes.santos@nms.unl.pt)

14

15 **Abbreviations used:** BM, breast milk; BSID, Bayley Scales of Infant Development; DOPAC, 2-(3,4-  
16 dihydroxyphenyl)acetic acid; EHC, enterohepatic circulation; FRAP, ferric reducing antioxidant  
17 power; LMW, low molecular weight; MDI, Mental Developmental Index; OAT, organic acid  
18 transporter; ORAC, oxygen radical absorbance capacity; PDI, Psychomotor Development Index; PLS-  
19 3, Preschool Language Scale-3; SC, systemic circulation; SPE, solid phase extraction; TEAC, trolox  
20 equivalent antioxidant capacity; TRAP, total reactive antioxidant potential

21

22

23

24

## 25 **Abstract**

26 Human breast milk is the first food source available to newborns and is responsible for  
27 healthy growth and development during the first months of life. Human breast milk contains  
28 vitamins, hormones, cytokines, microbiota, and immune cells that are responsible for such  
29 healthy conditions. Nonetheless, knowledge of the vast array of molecules present in human  
30 breast milk and their potential health effects is still lacking. The effects of mothers' diets on  
31 the molecules present in human breast milk are also generally unknown. The health benefits  
32 of (poly)phenols have been largely increasing but their presence in breast milk has been put  
33 largely aside. The impact of the mother's diet in the presence and quantification of these  
34 molecules in milk has also been overlooked. Above all, the potential benefits of  
35 (poly)phenols for newborns are just a vast emptiness of what is known about (poly)phenol  
36 research.

37 **Keywords:** Polyphenols, Breast Milk, Newborn, Metabolites, Concentrations

38

## 39 **1. Introduction**

40 Human breast milk is produced by the mammary gland and is essential for the healthy  
41 growth and development of newborns. Human breast milk is characterized by a huge  
42 complexity and diversity of components, including nutrients, such as proteins,  
43 carbohydrates, and lipids (1); bioactive components, such as immunoglobulins, stem cells,  
44 cytokines, hormones, growth factors, and phytochemicals (2); and a vast array of bacteria,  
45 such as *Staphylococcus*, *Streptococcus*, *Bifidobacterium*, *Lactobacillus*, and *Clostridium*  
46 cluster XIVA–XIVb (3). This chemical and biological diversity of agents in its composition  
47 provides the infant with well-balanced nutrition and protection against potential infectious  
48 pathogens as the infant immune system develops (4). For these reasons and for optimal  
49 health and growth, the World Health Organization (5) recommends that infants be  
50 exclusively breastfed for the first six months of life, and that breastfeeding continues to be an

51 important part of the diet until the infant is at least two years old. In addition to nutrients,  
52 vitamins, cells, and other compounds beneficial for health, it is not surprising that breast milk  
53 also contains some undesirable molecules, for example xenobiotics. Environmental  
54 xenobiotics in air, water and soil are absorbed by organisms through ingestion, inhalation or  
55 dermal absorption and enter the human food chain and often can be found in milk samples  
56 (6).

57 Human breast milk is a dynamic fluid that arises from the lactation process and develops to  
58 the different newborn needs. Breast milk can be classified into different stages based on its  
59 chemical composition. The first stage is pre-colostrum. This occurs as result of the process  
60 of lactogenesis that starts as early as the second trimester of pregnancy, the 16<sup>th</sup> week of  
61 pregnancy, due to the increased levels of estrogen and progesterone in the circulation (7).  
62 From day 5 up until day 7 after birth, colostrum is secreted and has a sticky consistency of  
63 yellow color given by the presence of carotenes from dietary intake. Colostrum is  
64 characterized by its nutritional, immunological and growth functions. The third stage is the  
65 transition milk produced between days 4 and 15 after childbirth, which shows a white color  
66 due to the emulsification of fats and the strong presence of calcium caseinate (7). Finally,  
67 mature milk, is produced from the 15<sup>th</sup> postpartum day looking like a thinner and diluted milk  
68 (8). During the different maturation stages of human breast milk, a high degree of  
69 interindividual differences can be expected in milk that may arise from differences in milk  
70 production and possible differences in transport of the molecules and other milk components  
71 like cells from blood to milk. Moreover, these differences are expected to be at least partially  
72 explained by a different dietary intake of the mother. However, we still lack knowledge on  
73 how diets like the Mediterranean diet, or vegetarian diets, rich in phytochemicals, might  
74 influence on the content of these compounds or their metabolites in human breast milk and  
75 how these might impact the health and development of the newborn.

76 Thousands of different dietary phytochemicals have been identified in human breast milk,  
77 of which carotenoids and (poly)phenols (9), represent by far the largest groups (10,11). In

78 this study, we focused on the role of (poly)phenols such as phenolic acids, flavonoids,  
79 stilbenes, coumarins, lignans, and tannins (Figure 1) and their host and microbial  
80 metabolites for their well-documented protective and health-promoting properties, which  
81 are less understood compared to carotenoids (12).

82 (Poly)phenols, a class of phytochemicals containing at least one phenolic ring, that are  
83 present in large quantities in fruits and vegetables like soybeans, cocoa beans, oranges and  
84 berries, as well as tea and coffee (13). They are believed to have health benefits, including  
85 protection against oxidative stress and inflammation, and may decrease the risk of chronic  
86 and degenerative diseases such as neurodegenerative disorders, obesity, cancer, and  
87 diabetes (14–18). They are classified in flavonoids and non-flavonoids where the latter  
88 include lignans, stilbenes, coumarins, tannins and simple phenolics/phenolic acids (Figure  
89 1). Flavonoids represent the vast majority of (poly)phenols present in a fruit- and vegetable-  
90 rich diet, and include different subclasses such as: flavones, isoflavones, flavan-3-ols,  
91 flavonols, flavanones and anthocyanins. These (poly)phenols have demonstrated biological  
92 activities, including antioxidant and anti-inflammatory activities, consistent with the promotion  
93 of vascular health, bone health, and cognitive function (14,16,19). It has been demonstrated  
94 that the biological activities of all these phenolic compounds may be mediated by their  
95 metabolites which are produced *in vivo* (host and microbial metabolites), as in the case of  
96 urolithins, the ellagic acid microbial metabolites (20) and phenolic acids, the flavonoid  
97 microbial metabolites (16,21).

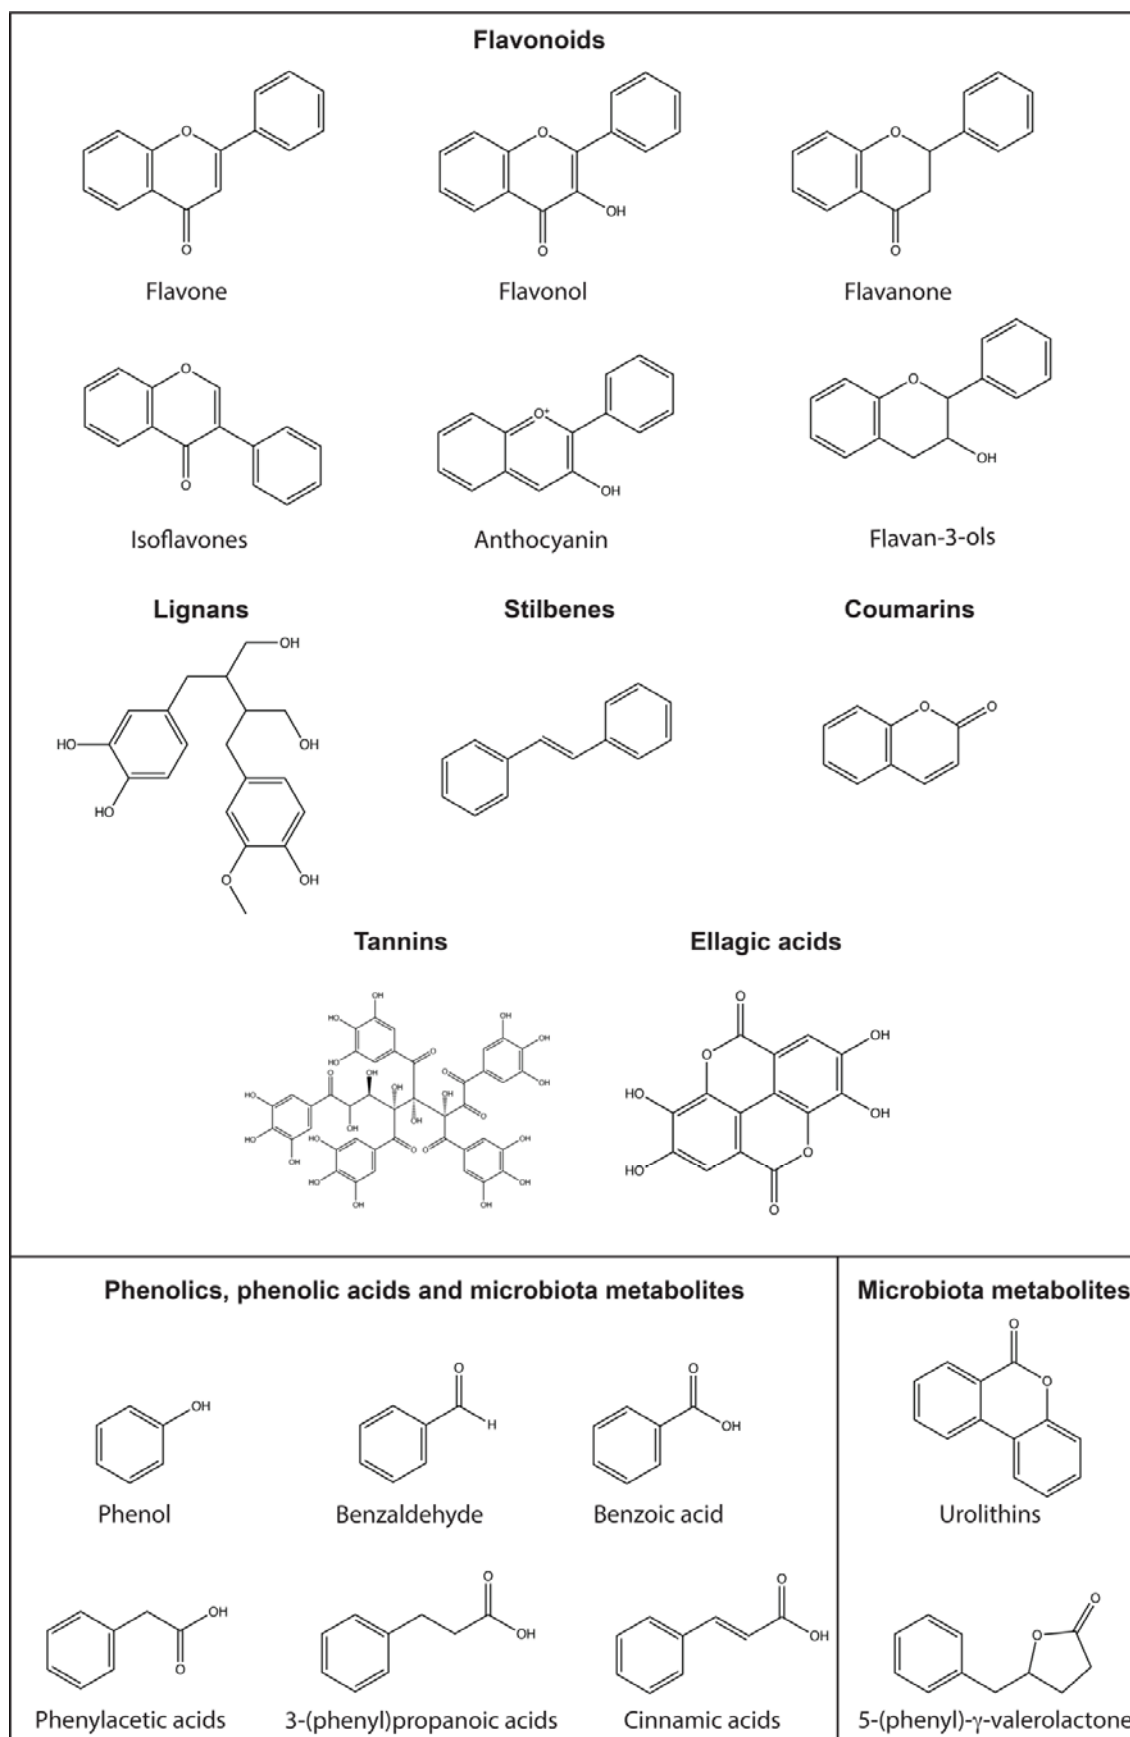

99 Figure 1 – Chemical structures of common dietary (poly)phenols and microbiota metabolites.  
100 In the figure are represented common dietary (poly)phenols like: flavonoids, lignans,  
101 stilbenes, coumarins, tannins and ellagic acids. Furthermore, phenolics and phenolic acids  
102 are present in diet and can also result from the microbiota. Meanwhile, some molecules are  
103 only generated from the microbiota like urolithins from ellagic acids and 5-(phenyl)- $\gamma$ -  
104 valerolactones from flavan-3-ols.

## 105 **2. Absorption, metabolism, and distribution of (poly)phenols**

106 Owing the wide variety of (poly)phenols, like flavonoids, phenolic acids, ellagic acids, among  
107 others, bioavailability varies a lot from one family to another. Some flavonoids like  
108 anthocyanins, isoflavones such as genistein and daidzein and the flavanol quercetin can be  
109 partially absorbed as early as in the stomach(22–25). However, most flavonoids are found in  
110 foods conjugated with sugars, esterified with organic acids, and polymerized, which  
111 decreases their absorption in the stomach, reaching the small intestine. In the intestine intact  
112 glycosides may undergo the action of lactase phloridzin hydrolase or cytosolic  $\beta$ -glucosidase  
113 breaking the sugar bond and releasing the respective aglycones which are subsequently  
114 absorbed. (Poly)phenols that are not absorbed in the small intestine reach the colon where  
115 they are transformed by the gut microbiota (Figure 2). In the case of flavonoids, they  
116 undergo catabolic reaction by the gut microbiota producing the low molecular weight  
117 phenolic metabolites also known by simple phenolics and phenolic acids, some of which  
118 common to those found in plants and already absorbed in initial phases of digestion, like  
119 benzoic acids (13,26). In fact, simple phenolics and phenolic acids present in the gut might  
120 result from two distinct pathways i) directly from the intake of fruits and vegetables or ii) the  
121 result of gut microbiota catabolism of flavonoids. Meanwhile, several (poly)phenols  
122 metabolites can only be produced by gut microbiota. This is the case of equol, produced  
123 exclusively by gut microbiota catabolism of the isoflavone daidzein, enterodiol and  
124 enterolactone, produced by catabolism of lignans, 5-(phenyl)- $\gamma$ -valerolactones characteristic  
125 microbial metabolites of flavan-3-ols or urolithins the gut microbiota metabolites of

126 ellagitannins and ellagic acid (27–29). In the case of equol and urolithins the presence of  
127 specific bacteria in the microbiota of the volunteers allowed to classify them in different  
128 metabotypes (20). For equol the two metabotypes differentiate equol-producers and equol-  
129 non producers. Meanwhile for urolithins three different urolithin metabotypes exist according  
130 to the capability of gut microbiota of the host to catabolize ellagic acid. These are  
131 metabotype A: producers of urolithin A; metabotype B: producers of urolithin A and also  
132 isourolithin A and/or urolithin B, and metabotype 0: non producers of urolithins (20,30).

133 Directly after their absorption in the small intestine or in the colon, (poly)phenols and their  
134 gut microbiota catabolites are extensively metabolized at both the intestinal and hepatic  
135 levels. Independently of the type of (poly)phenol, all undergo phase I and II metabolic  
136 reactions mediated by sulfotransferases, methyltransferases and glucuronyltransferases.  
137 Once in portal circulation, (poly)phenols metabolites travel into the liver where they undergo  
138 further phase I and II metabolic reactions. From the liver, (poly)phenols or their metabolites  
139 may reenter the intestine through bile salts and the enterohepatic circulation (EHC) or enter  
140 systemic circulation (Figure 2). In circulation, (poly)phenols metabolites spread across the  
141 different organs and tissues to exert their potential biological effects or are retrained in the  
142 kidneys and eliminated through urine. Importantly, several phenolic metabolites resulting  
143 from dietary intake or gut microbiota catabolism of flavonoids are also produced by some  
144 endogenous pathways. Some examples of molecules shared between pathways may  
145 include hippuric acid, homovanillic acid and 3',4'-dihydroxyphenylacetic acid.

146 In lactating women, different (poly)phenols and their metabolites, mainly flavonoids, phenolic  
147 acids and ellagic acid and urolithin metabolites, have been detected in breast milk, as will be  
148 discussed ahead. These are expected to travel from blood circulation reaching the mammary  
149 glands (Figure 2), although the mechanism of transport has not been fully characterized.  
150 (Poly)phenols or their metabolites present in breast milk will start a new cycle of digestion as  
151 they will be ingested by the newborn infant. Importantly due to early stages of gut microbiota  
152 development in the infant, the amount of (poly)phenol metabolism expected in the infant is

153 limited in comparison with the mother, but much about the infant microbiota capability to  
154 metabolize (poly)phenols is still unknown.

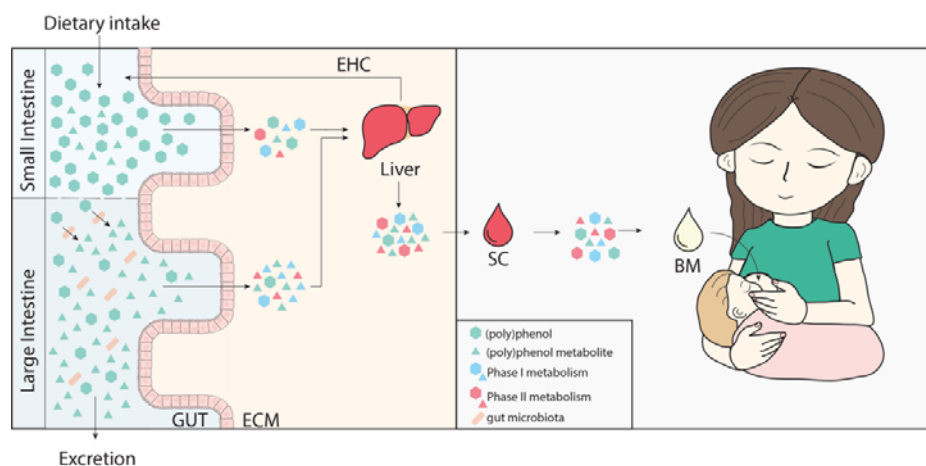

155

156 Figure 2- (Poly)phenol journey from dietary intake to breast milk in mothers and delivery the  
157 infant. (Poly)phenols are up taken from the diet reaching the gut. In the mother's gut these  
158 (poly)phenols are absorbed and potentially modified by phase I and II metabolic reactions.  
159 Meanwhile (poly)phenols may be catabolized by gut microbiota into low molecular weight  
160 phenolics that are also up taken and undergo phase I and II metabolic reactions. All these  
161 compounds reach the liver and are released into circulation where they may reach breast  
162 milk. EHC – enterohepatic circulation; SC – systemic circulation; BM – breast milk.

163

### 164 3. (Poly)phenolic content in Human Breast Milk

#### 165 3.1 Search strategy

166 First, we searched the most well-known metabolomic and/or (poly)phenolic databases  
167 regarding presence of (poly)phenols in breast milk, e.g., HMDB, phenol-explorer, phyto-hub,  
168 metabolomics workbench, among others(31–33). Overall, only HMDB reported detection and  
169 quantification of (poly)phenols in human breast milk (34). A total of 122 metabolites have  
170 been detected in human breast milk according to HMDB, mainly including amino acids,  
171 short-chain-fatty acids, sugars, and carotenoids. From this list the only (poly)phenol



172 metabolite reported was hippuric acid (34). Unfortunately, hippuric acid is also common to  
173 endogenous pathways and is difficult to pinpoint its origin (endogenous versus dietary).

174 Afterwards, we searched PubMed for articles containing the words: “human milk” or “human  
175 breast milk” and “polyphenol” or “flavonoid”. In total, we found 63 articles of which 2 were  
176 excluded due to duplication. Furthermore, 7 additional records were added since were found  
177 through other meanings (e.g., through in-text citing references). From the 68 records, 4 have  
178 been excluded since were not available in English. Furthermore, 45 articles have been  
179 excluded since they did not perform detection and/or quantification of (poly)phenols or  
180 human breast milk has not been used. (Figure 3).

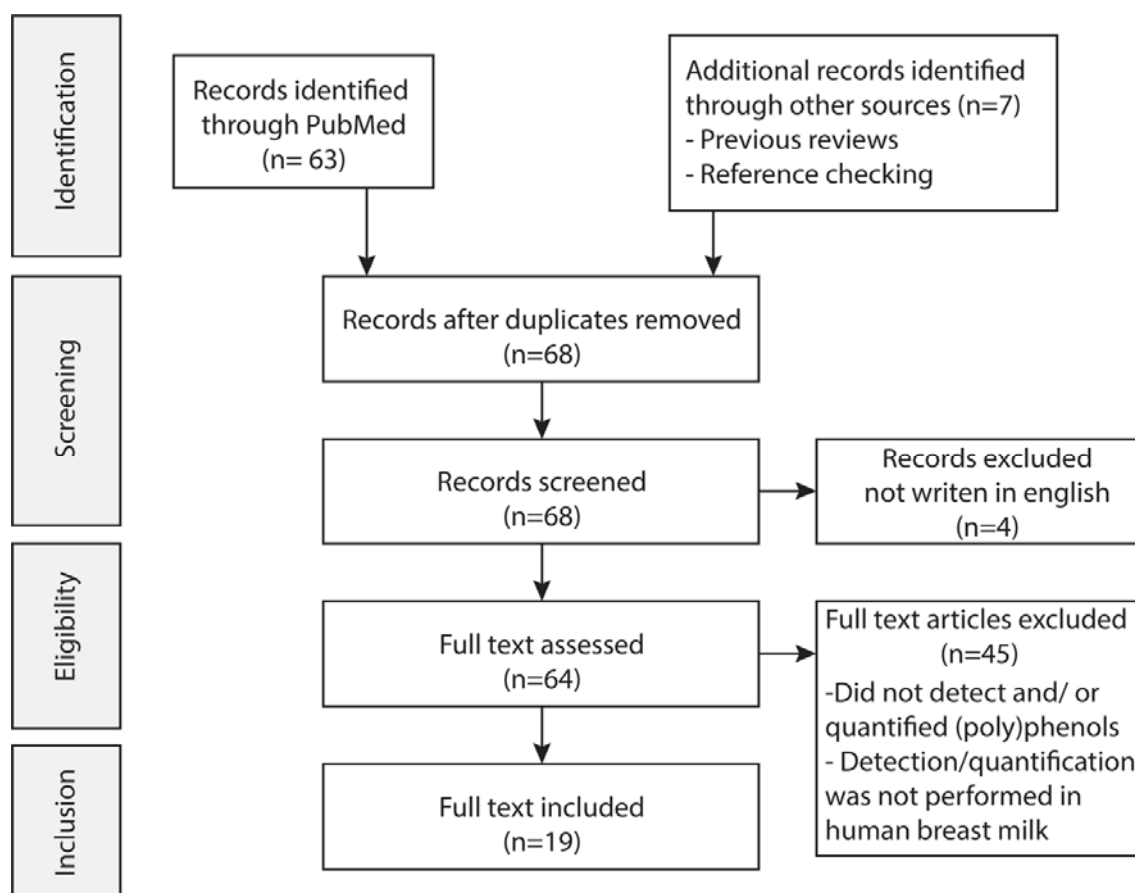

181

182 Figure 3. Search strategy for the literature review and revision process

### 183 3.2 Records reporting (poly)phenol quantification

184 From the list of records found, 19 have detected and quantified dietary (poly)phenols and/or  
185 metabolites in human breast milk. Of these, 12 have quantified (poly)phenols and/or  
186 metabolites from dietary intervention studies (Table 1) while 7 have quantified (poly)phenols  
187 and/or metabolites in free-living subjects (Table 2). Meanwhile, 15 of these 19 studies have  
188 quantified flavonoids, 4 have quantified ellagic acid or urolithins metabolites, and 6 studies  
189 have reported the quantification of low molecular weight phenolics (phenolic acids or simple  
190 phenols), see Table 1 and Table 2. Noteworthy 4 of the 7 studies quantifying (poly)phenols  
191 and/or metabolites in free-living subjects have included food-frequency questionnaires to the  
192 participants of the study to monitor their diet.

193 Several studies have shown the presence of isoflavones, mainly daidzein and genistein in  
194 human breast milk after dietary interventions using isoflavone rich foods like soybean milk  
195 (35,36), and roasted soybean (37–39). Meanwhile other flavonoids like flavan-3-ols and their  
196 microbial metabolites, 5-(phenyl)- $\gamma$ -valerolactones were quantified in human breast milk after  
197 consumption of dark chocolate (40). Meanwhile, flavanones were detected after consumption  
198 of grapefruit juice (41), flavonols after onion soup intake (42) and the ellagitannin microbial  
199 metabolites, urolithins, after nuts and pomegranate consumption (20,43). In other studies,  
200 several (poly)phenol compounds, including different families of flavonoids, microbial  
201 metabolites, and phenolic acids, were tentatively identified in breast milk after consumption  
202 of red raspberry (44), and several in free-living conditions summarized in Table 2.

203 As previously described, breast milk composition evolves over time while the newborn  
204 matures. Most studies have only used matured milk as the sample to detect and quantify  
205 (poly)phenols and/or metabolites (Table 1 and Table 2). Meanwhile, transition milk has only  
206 been used in four studies and colostrum in three studies, all with free-living mothers.  
207 Notably, the three studies reporting (poly)phenol and/or metabolites quantification in  
208 colostrum have also used transitional milk and mature milk as samples.

209 Khymenets *et al.* was able to quantify some epicatechin phase II conjugates (epicatechin-4-  
210 glucuronide, epicatechin-2-sulfate and epicatechin-3-sulfate) and several gut microbiota

211 derived metabolites like 5-(3',4'-dihydroxyphenyl)- $\gamma$ -valerolactone-sulfate and glucuronide  
212 conjugates (40). In this study, participants were in a free-living diet condition and answer to  
213 24-hour dietary recall and food frequency questionnaires showing that the total (poly)phenol  
214 consumption through the diet did not significantly change during the different lactation  
215 periods. However, concentrations of the detected metabolites were very sporadic and varied  
216 significantly only being detected in a limited number of samples across the different lactation  
217 phases. For this reason, the authors were unable to compare the changes in concentrations  
218 amongst the different lactation stages.

219 Meanwhile, Sánchez-Hernández *et al.*, showed differences in the average amount of total  
220 (poly)phenols present in colostrum, transitional and matured milk, 661, 773 and 652  $\mu\text{g}/100$   
221 mL respectively, of free-living individuals in comparison with infant formula, 375  $\mu\text{g}/100$  mL,  
222 (9). Noteworthy, this reflects in general on a 2-fold increase in total (poly)phenol content in  
223 human breast milk in comparison with formula milk (only 375  $\mu\text{g}/100$  mL), reflecting that  
224 formula milk does not recapitulate complete human breast milk concerning (poly)phenol  
225 content. Regarding the different stages of human breast milk, despite being a non-static fluid  
226 that changes with time, no difference in total (poly)phenol content or antioxidant capacity  
227 was observed among the three different types of milk.

228 In a different study Song *et al.*, was able to quantify several flavan-3-ols (epicatechin,  
229 epicatechin-gallate and epigallocatechin gallate), flavonols (quercetin and kaempferol) and  
230 flavanones (naringenin and hesperitin) in breast milk samples from free-living mothers at  
231 weeks 1, 4 and 13 postpartum (14). The concentrations of the those (poly)phenols did not  
232 seem to change, independently of the timepoint of collection (week 1, 4 or 13), with the only  
233 exception being kaempferol that significantly increased at week 13. The authors point out  
234 that the levels of flavonoids during the three periods suggest that (poly)phenols in human  
235 milk are generally not affected by lactation stage. Unfortunately, in this study the food intake  
236 of the mothers was not evaluated and thus the estimation of (poly)phenol intake for each  
237 mother was not performed. For this reason, it is possible that some of the variability in

238 kaempferol concentrations might be due to the food intake of the mother. In fact, from the list  
239 of studies identified, the study by Lu *et al.* was the only that fully characterized and stratified  
240 samples according to the food intake (2). For that maternal intake of plant-based foods and  
241 (poly)phenols was estimated through 3-day dietary records and the use of Phenol-Explorer  
242 database. The study concluded that the intake of plant-based foods significantly affected  
243 phenolic composition in breast milk.

244 Meanwhile Romasko *et al.* showed that the amount of naringenin in breast milk in free living  
245 mothers with their everyday diet, resulted in an average naringenin concentration in breast  
246 milk of 823.24 nmol/L (41). Upon consumption of red grapefruit juice, rich in naringenin and  
247 naringin (naringenin-7-glucoside) this concentration did not significantly increase at 4 or 12  
248 hours, 908.25 nmol/L  $\pm$  676.84 nmol/L, and 868.96 nmol/l  $\pm$  665.54 nmol/L, respectively. In  
249 this case, the consumption of a glass of grapefruit juice did not significantly affect naringenin  
250 levels in milk. Eventually the concentrations of naringenin decreased after 48 hours to  
251 673.89 nmol/L. Meanwhile in a study by Jochum *et al.* two different interventions were used  
252 and compared against a control (300 mL water) drink: i) 250 mL of soy drink or ii) 300mL of  
253 decaffeinated black tea (36). Unfortunately, no flavonol was detected before or after the  
254 intervention with black tea. Yet, in the soy drink group, genistein and daidzein were detected,  
255 but only after the intervention.

256 The changes in values across these studies may be related to several factors. One of the  
257 most important is dietary exposure to different amounts of (poly)phenols and/or foods  
258 containing different/specific (poly)phenols. Dissimilarities in the dietary habits among  
259 different populations could lead to high variability in the results obtained. It is very important  
260 to define dietary habits during lactation to fully understand how these changes in  
261 (poly)phenol and/or metabolites quantification is dependent on the mother's diet. However,  
262 there is still limited information on the relationship between maternal dietary intake and  
263 phenolic content in breast milk. Besides, although the concentration of the compounds is  
264 dependent on the dose ingested by the mother, other regular components of the matrix such

265 as proteins, lipids and carbohydrates could affect the extraction and detection of these  
266 compounds.

267 Other important factors that could influence the detection and quantification of (poly)phenols  
268 and/or metabolites in human breast milk could be the kinetic of deposition in milk,  
269 interindividual differences in the metabolism and genetic/physiological factors and/or stability  
270 of (poly)phenols and/or metabolites in breast milk matrix. Although with the available studies,  
271 the time of milk collection has not been demonstrated to be a crucial factor, more studies  
272 with large population are needed to confirm these results. The methodology for the collection  
273 of breast milk samples could also be another critical point. Most of the time the volume of  
274 the milk produced by the mammary glands of the mothers is not measured, so the data  
275 obtained from the milk analysis only provide concentrations and not the total amount  
276 produced, what makes more difficult to compare among studies. Number of volunteers  
277 across the 19 studies herein reported has also shown a significant pitfall on the data  
278 available to researchers and clinicians. Until now only one study has used a sample size  
279 equal to 50 volunteers, while most studies have used sample sizes below 30 volunteers, with  
280 a significant number of studies with a sample size below 10 and some proof-of-concept/case  
281 studies with sample sizes of just one or two individuals. Such sample size, together with the  
282 normal interindividual variability detected in (poly)phenol bioavailability (26,45) clearly makes  
283 it difficult to understand the dynamics of (poly)phenols metabolites in breast milk. Larger  
284 populations are necessary to obtain final conclusions about concentrations of metabolites in  
285 breast milk and factors affecting.

286 Differences in the methodologies used for the extraction and analysis (identification and  
287 quantification) of these compounds in breast milk also hamper the comparison among  
288 studies.

289 The complexity of the milk matrix partly explains why the determination of (poly)phenol-  
290 derived metabolites in breast milk has hardly been investigated. Most of the methodologies  
291 are not optimized and validated and the recovery percentages of (poly)phenol metabolites

292 are usually unknown for the different extraction protocols. Most previous studies have  
293 determined (poly)phenols in human milk after enzymatic hydrolysis ( $\beta$ -glucuronidase and  
294 sulfatase) and subsequent extraction with ethyl acetate (see Table 1 and Table 2). The  
295 enzymatic hydrolysis simplifies the separation and quantification of the major compounds  
296 and provides an idea of the total amount of a specific aglycone (free compound plus  
297 conjugated) but information about the nature of the metabolites available and the amount of  
298 individual conjugated metabolites is lost. Only 5 studies provide information about naturally  
299 occurring metabolites (glucuronides and sulfates) present in breast milk (40,43,44,46,47).  
300 Protein precipitation with acetonitrile or methanol and solid phase extraction (SPE) were also  
301 applied for the extraction of these compounds with and without previous enzymatic  
302 hydrolysis. In some cases, a previous clean up with hexane was applied to defat the  
303 samples and other methods to remove proteins were also used (hydrolysis with pepsin,  
304 salting-out assisted liquid-liquid extraction, precipitation with organic solvents, etc.).  
305 However, little information about recoveries and validation parameters was provided to  
306 evaluate the results and identify the best extraction protocol for each family of compounds.  
307 Only two studies have shown a comprehensive test between the different extraction  
308 methodologies (46,48). The data showed that acetonitrile: formic acid (95:1)  
309 extraction/protein precipitation method was the most effective method to obtain ellagic acid  
310 metabolites in comparison to methanol, hexane and SPE (46). Meanwhile Edyta Nalewajko-  
311 Sieliwoniuk showed that hexane defat followed by acidification and ethyl acetate: acetonitrile  
312 extraction was the most effective method for the extraction of several flavonoids and  
313 phenolic acids (48). Unfortunately, this protocol includes the use of  $\beta$ -glucuronidase and  
314 sulfatases. In general, it seems that ethyl acetate, which is frequently used for isolation of  
315 dietary phenolic compounds, is a good solvent for the extraction of aglycones after  
316 enzymatic hydrolysis. However, when more polar compounds such as glucuronide and  
317 sulfate conjugates are extracted, the recoveries are low and other protocols based of  
318 precipitation of protein with organic solvents or solid phase extraction should be used.

319 Another question that could affect the extraction and analysis of compounds in the different  
320 studies is the nature of the milk (content of protein and lipids) that could affect the extraction  
321 protocol with the formation of gel aggregates or the precipitation of some compounds.

322 Besides, the way of quantification is another important question that could influence the  
323 results in the different studies. In most cases the absence of commercial standards forces to  
324 quantify using other available standards, obtaining inaccurate results not comparable among  
325 studies.

### 326 **3.3 Detected and quantified (poly)phenols in human breast milk**

327 Across the 19 records reporting (poly)phenols and metabolites in human breast milk a total  
328 of 25 flavonoids, 58 low molecular weight phenolics and 9 ellagic acid metabolites were  
329 detected (Figure 4, Table 3-5). The list of flavonoids included the most representative  
330 subfamilies of flavonoids: anthocyanins, flavonols, flavan-3-ols, isoflavones and flavanones  
331 (Table 3, Figure 4). Interestingly besides sulfate and glucuronide conjugates some flavonoid  
332 glycoside conjugates have been found in human breast milk (Table 3). From the 9 ellagic  
333 acid metabolites, urolithin A, isourolithin A and urolithin B and respective sulfate and  
334 glucuronide metabolites were reported together with dimethyl ellagic acid-glucuronide, but  
335 not ellagic acid (Table 4, Figure 4). Regarding the low molecular weight phenolics detected,  
336 these ranged from benzoic acids, benzaldehydes, phenylacetic acids, 3-(phenyl)propanoic  
337 acids, cinnamic acids, 5-(phenyl)- $\gamma$ -valerolactones, hippuric acids and chlorogenic acid  
338 (Table 5, Figure 4). Anthocyanins, isoflavones, flavanones and ellagic acid metabolites have  
339 not been detected in all types of milk, by contrast with the remaining (poly)phenolic classes  
340 that have been detected across all the different types of milk (colostrum, transitional and  
341 mature). It is however important to note that most studies have used one type of milk only,  
342 mature milk, thus explaining why several (poly)phenols have been detected in only one milk  
343 type.

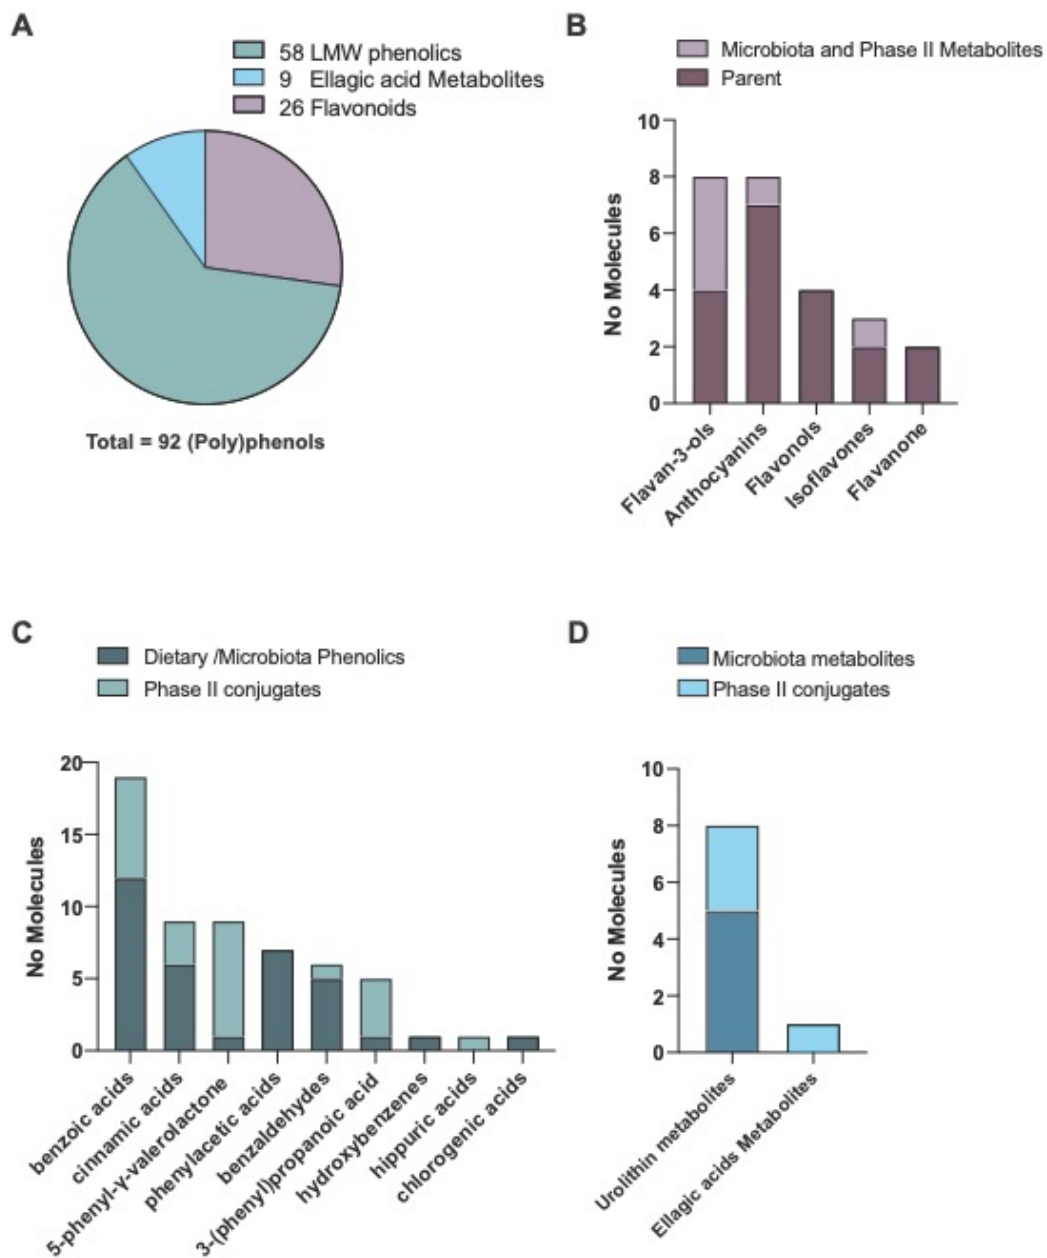



345 Figure 4- Ninety-two (poly)phenols and metabolites have been identified and/or quantified in  
346 human breast milk samples across the 19 reports identified. (A) From the overall list of compounds  
347 58 were low molecular weight (LMW) phenolics, 9 ellagic acid metabolites, and 25 flavonoids. (B)  
348 The 25 flavonoids spread across flavan-3-ols, anthocyanins, flavonols, isoflavones and flavanones. (C)  
349 The low molecular weight phenolics and their phase II conjugates are divided into benzoic acids,  
350 cinnamic acids, 5-phenyl- $\gamma$ -valerolactones, phenylacetic acids, benzaldehydes, 3-(phenyl)propanoic  
351 acids, hydroxybenzenes, hippuric acids and chlorogenic acid. (D) The 9 ellagic acids and/or  
352 metabolites and their phase II conjugates are divided into 8 urolithin metabolites and 1 ellagic acid  
353 metabolites. Individual concentrations for each (poly)phenol are reported in tables 3, 4, and 5.

354

355 Among the flavan-3-ols, commonly found in chocolate(49), epigallocatechin-gallate was the  
356 molecule detected at highest concentrations in breast milk, ranging from 0.67 to 1.12 $\mu$ M  
357 (Figure 5A, Table 3). In previously reported intervention studies, reviewed in (50), this  
358 molecule was detected in plasma, on average, at much lower concentrations, ranging from  
359 0.03 to 0.38 $\mu$ M(50). Meanwhile, a more recent review shown higher plasma concentrations  
360 with a mean C<sub>max</sub> across several studies of 0.87  $\pm$  1.33 $\mu$ M, on par with breast milk  
361 concentrations(51). By contrast, other flavan-3-ols like (epi)catechin, was detected at higher  
362 concentration in plasma ranging from 0.09 to 1.10 $\mu$ M, in comparison to breast milk of 0.03 to  
363 0.24 $\mu$ M(50). Meanwhile, quercetin was the flavonol detected in highest concentrations in  
364 human breast milk ranging from 0.05 to 0.15 $\mu$ M (Figure 5B, Table 3). Remarkably in the  
365 study performed by Zhang et al. 2018 measuring quercetin in both breast milk and plasma of  
366 the mothers, it was shown that quercetin was more abundant in breast milk and urine in  
367 comparison with plasma(44).

368 Regarding the flavanones naringenin and hesperidin, commonly found in citric fruits(49),  
369 have been detected in plasma at concentrations ranging from 0.13 to 1.50 $\mu$ M and 0.21 to  
370 0.87 $\mu$ M respectively (Figure 5C, Table 3). Meanwhile, in breast milk both flavanones have

371 been detected at lower concentrations ranging between 0.01 to 0.91 $\mu$ M for naringenin and  
372 from 0.004 to 0.46 $\mu$ M for hesperidin (Table 3). Regarding isoflavones, daidzein and  
373 genistein have been found in plasma ranging from 0.76 to 3.00 $\mu$ M and 1.26 to 4.50 $\mu$ M,  
374 respectively(50). Meanwhile, in breast milk these two isoflavonoids have been found in much  
375 lower concentrations ranging from 0.009 to 0.10 $\mu$ M and 0.005 to 0.12 $\mu$ M respectively  
376 (Figure 5C, Table 3).

377 The urolithin metabolites urolithin A-glucuronide and urolithin B-glucuronide were the two  
378 most abundant ellagic acid metabolites found in breast milk at 0.03 $\mu$ M and 0.02 $\mu$ M  
379 respectively (Figure 5D, Table 4). In plasma these two metabolites have been found at  
380 identical concentrations of 0.02 $\mu$ M, similar to those of breast milk(52). On the opposite  
381 direction, urolithin A-sulfate detected in breast milk ranging from 0.008 to 0.02 $\mu$ M (Figure 5,  
382 Table 4), was detected at much higher concentrations in plasma of 0.45 $\mu$ M(52).

383 Meanwhile, a recent literature review revealed the full list of low molecular weight phenolic  
384 metabolites present in human blood(26). From this list of 137 phenolic metabolites detected  
385 in human blood, only 58 have been detected and or quantified in human breast milk (Table  
386 5). Most of these metabolites have been found in significantly higher concentrations in  
387 human plasma in comparison with human breast milk. For example, regarding the phenolic  
388 acid 3,4-dihydroxybenzoic acid and benzaldehyde 3,4-dihydroxybenzaldehyde, these have  
389 been found in breast milk at concentrations ranging from 0.01 to 0.02 $\mu$ M and 0.009 to  
390 0.01 $\mu$ M (Figure 5E, Table 5). While in plasma, these metabolites have been found up to  
391 16 $\mu$ M and 0.03 $\mu$ M respectively. Meanwhile, 4-hydroxyphenyl acetic acid, 4-hydroxy-3-  
392 methoxycinnamic acid (ferulic acid ) and 3-methoxycinnamic acid-4-glucuronide (ferulic acid-  
393 glucuronide) have been found in breast milk up to 0.27 $\mu$ M, 0.13 $\mu$ M and 0.3 $\mu$ M respectively  
394 (Figure 5F and Table 5). Whereas in plasma these have been found at 2.6 $\mu$ M, 0.42 $\mu$ M and  
395 0.36 $\mu$ M respectively. Noteworthy, the metabolite detected at higher concentrations in human  
396 breast milk was 3,4,5-trihydroxybenzoic acid with a range of 0.06 to 0.66  $\mu$ M (Figure 5E,  
397 Table 5) detected to a lesser extent in plasma 0.12  $\pm$  0.032 $\mu$ M, reviewed in (26).

398

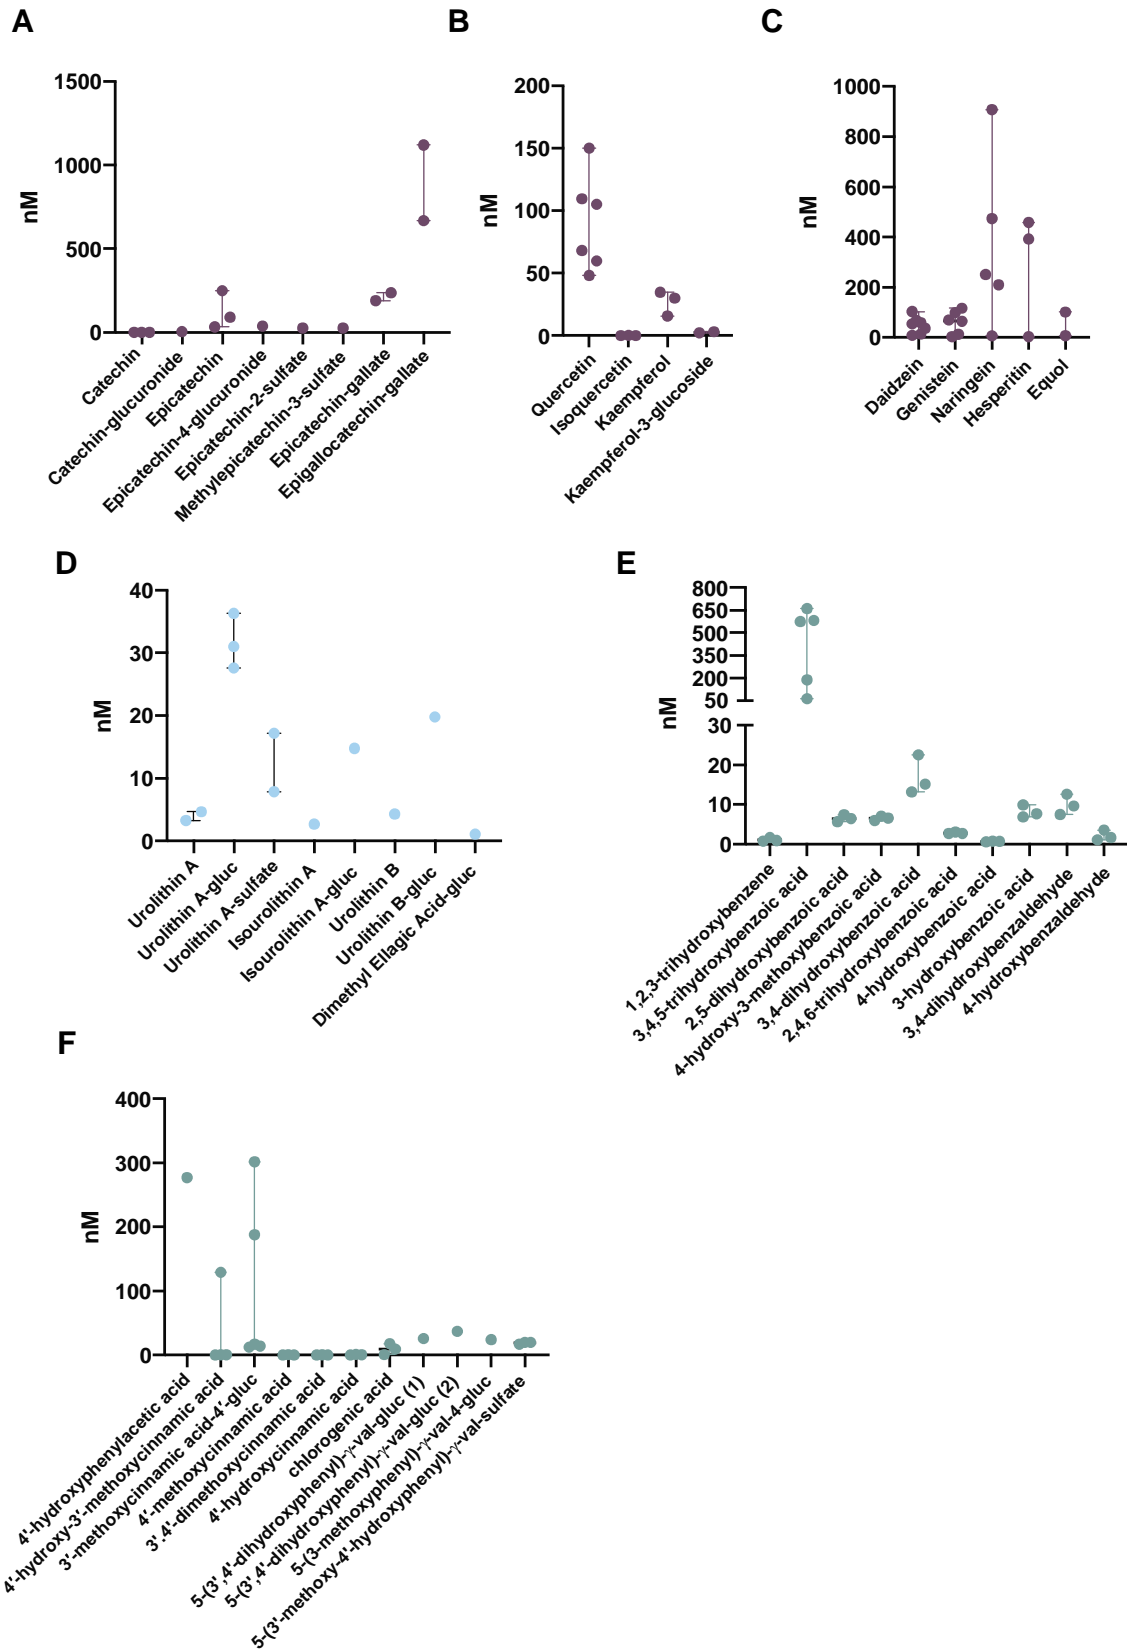

399

400 Figure 5 – Range of concentrations of (poly)phenols detected in human breast milk. (A) flavan-3-ols,  
401 (B) flavonols, (C) flavanones and isoflavones, (D) ellagic acid metabolites, (E) benzoic acids and  
402 benzaldehydes, (F) phenylacetic, cinnamic acids, chlorogenic acids and phenyl- $\gamma$ -valerolactones.  
403 Each dot represents the different concentrations reported in Tables 3, 4 and 5. Val – valeric acid; gluc  
404 – glucuronide.

405

406 Interestingly several classes of low molecular weight phenolics have not been detected in  
407 human breast milk. This may be related with the lack of standards and/or a target analysis  
408 excluding quantification of several metabolites, or the complete absence of this metabolites  
409 in human breast milk. Examples of such metabolites not detected in human breast milk are :  
410 2-(phenyl)propanoic acid, mandelic acid, cinnamoylglycine, 4-hydroxy-5-(phenyl)valeric acid,  
411 5-(phenyl)valeric acid, (phenyl)ethanol or 4-ethylbenzenes. Regarding ellagic acid  
412 metabolites, besides the 9 ellagic acid metabolites found in human breast milk and found in  
413 blood, others have been found in human blood but not in human breast milk, namely urolithin  
414 C, urolithin C glucuronide and urolithin C sulfate (34).

415 Overall, several reasons might explain the discrepancy between the number of (poly)phenols  
416 detected in blood versus human breast milk. Noteworthy the data obtained for plasma and  
417 breast milk samples have been obtained from different populations with probably differences  
418 in the dietary exposure of (poly)phenols and in the absorption and metabolism of these  
419 compounds. A particular relevant question is the possible changes on the metabolism of  
420 (poly)phenols of recent post-partum volunteer. Large studies quantifying (poly)phenols in  
421 both plasma and breast milk of the same volunteer are required comparing concentrations in  
422 both fluids and addressing this possibility. In the paper of Zhang *et al.*, most of the identified  
423 metabolites were detected in the three biological samples (plasma and urine of two  
424 volunteers and breast milk of another volunteer) and some were present in urine and breast  
425 milk but not in plasma. This may reflect some intrinsic physical chemical property of each  
426 compound to either stay in plasma or being rapidly eliminated from blood and accumulate in

427 urine and breast milk. Other factors could be i) their absence from human breast milk due to  
428 the lack of specific transporters impairing their path through the mammary tissue, ii) the  
429 timepoints used for the sampling and further quantification of the (poly)phenols metabolites  
430 in the milk iii) lower concentrations in human breast milk (below limit of quantification) in  
431 comparison with the already reported in circulation, iv) the fact these (poly)phenols  
432 metabolites have never been searched in human breast milk due to the lack of available  
433 standards, v) the extraction method is not fully compatible to all (poly)phenol metabolites.

434 One unsolved question that its understanding can shed light to some of these questions is  
435 the mechanism of transport allowing (poly)phenols and/or metabolites to reach human  
436 breast milk. The transport and delivery of (poly)phenols to the mammary glands is still  
437 unknown and may result from passive diffusion, active transport, or carrier mediated  
438 transport. For flavonoids, several methods of transport have been proposed to cross several  
439 tissues like the gut from passive diffusion to mediated transport, especially by ATP-binding  
440 cassette transporter (ABC transporters) and organic acid transporters (OAT), reviewed in  
441 (53). For phenolic metabolites it is hypothesized that passive transport might be the main  
442 route of transport across the tissue, although some transporters have already been  
443 described. These include gallic acid through OAT3 (54) and homovanillic acid through  
444 rOAT3 (55). Interestingly homovanillic acid is both an endogenous molecule, a metabolite of  
445 dopamine and a phenolic metabolite result of microbiota catabolism of flavonoids. Other  
446 phenolic metabolites that also result from endogenous pathways like hippuric acid and 2-  
447 (3,4-dihydroxyphenyl)acetic acid (DOPAC) that might benefit from the endogenous routes of  
448 transport. Furthermore, it also offers the possibility that structurally similar phenolics might  
449 share the same routes.

450

451

452 **4 The potential health benefits of (poly)phenols and phenolic metabolites in human**  
453 **breast milk**

454 Although multiple studies have reported the protective effects of (poly)phenols against  
455 inflammation, oxidative stress and cardiometabolic stress, and the potential of isoflavones as  
456 phytoestrogens, the full spectrum of effects of (poly)phenols in human breast milk, both from  
457 the mother and the newborn perspective, has not been fully explored. Across the different  
458 studies reported in the literature the evaluation of the impact of (poly)phenols detected in  
459 human breast milk have been rather limited to the anti-oxidative properties of milk or the  
460 quantification of phytoestrogens and its impact on the newborn development.

461 Regarding the anti-oxidative properties of (poly)phenols in human breast milk Poniedzialek  
462 *et al.*, showed that an increase in total (poly)phenols in human breast milk associated with a  
463 higher total antioxidant capacity that were positively correlated with vegetable consumption  
464 (56). Total (poly)phenols also correlated negatively with malondialdehyde content.  
465 Noteworthy it is important to bring attention to the high degree of variability of samples  
466 collected. Li *et al.*, compared the total (poly)phenol content in samples from breast milk and  
467 infant formula. In this case no significant change was detected as the variability within breast  
468 milk and infant formulas was significant (422 – 751 mg/kg and 329 – 797 mg/kg of ferulic  
469 acid equivalents respectively) (57).

470 A different study by Silberstein *et al.*, showed that the (poly)phenolic content in breast milk  
471 seems to be influenced by maternal health status (58). The study has shown that the breast  
472 milk composition of preeclampsia women presents a 33% increase in total (poly)phenol  
473 content in comparison with healthy women (58). The increase in total (poly)phenols in  
474 mothers with preeclampsia was associated with a reduction in about 20% the levels of lipid  
475 oxidation in colostrum in comparison with healthy women (58). Unfortunately, the authors  
476 only measured the total amount of (poly)phenols and did not investigate the presence or  
477 effects of specific (poly)phenols or their metabolites.

478 Concerning isoflavones, these have been classified as phytoestrogen for their chemical  
479 similarity with estradiol and the capability to induce estrogenic or anti-estrogenic effects  
480 depending on the dose (59). Isoflavones as phytoestrogens bind to estrogen receptors alpha  
481 and beta (59). Isoflavones are present across several fruits and legumes with significant  
482 relevance in soybeans and soy-based produces like soy milk and tofu. For their capability to  
483 act as phytoestrogens, soy and soy-based products have been used in infant formulas in the  
484 last century and their effects analyzed.

485 Setchell et al., compared the presence of isoflavones in 4-month-old infant blood samples  
486 consuming human breast milk, soy-based infant formulas, and cow-based milk formulas  
487 (60). The concentration of isoflavones circulating in babies fed with human breast milk was  
488 on average 4.7 ug/L in comparison with the 9.4 ug/L of cow-based infant formula and the  
489 979.7 ug/L of soy-based formula. This high plasma isoflavones concentrations in infants  
490 consuming soy-based formula are however much higher than the normal estradiol  
491 concentrations for infants of this age. One phenomenon detected was the lack of isoflavones  
492 metabolites, namely equol and its metabolites, from soy-based infant formula since the  
493 formation of this metabolites are largely dependent on the gut microbiota of the mother (60).

494 Meanwhile, Rosa et al. also showed a significant difference on the urinary phenolic  
495 metabolites of 3-month-old infants feed with breast milk, cow-based infant formula, and soy-  
496 based infant formula (61). In this study the overall quantity of phenolic metabolites excreted  
497 in infant urine was 2-fold higher for some metabolites, namely 3'-hydroxyphenylacetic acid  
498 and 4'-hydroxyphenylacetic acid in infants feed with soy-based infant formula in comparison  
499 with human breast milk feed infants (61).

500 Although the evidence suggests an increase of isoflavones levels in infants fed with soy-  
501 based formulas there is no clear evidence of a health benefit. In fact, a meta-analysis could  
502 not find any negative effects of a high isoflavone intake from soy formulas, but also no  
503 benefits, on endocrine and other physiological functions of breastfeeding (62). The authors

504 speculated that most isoflavones detectable in the plasma of soy fed infants are conjugated  
505 to sugars, which cannot link to isoflavone receptors.

506 Regarding the cognitive developmental status of infants, Andres *et al.*, 2012 evaluated 1  
507 year old infants consuming breast milk, cow-based milk formula or soy-based milk formula.  
508 In this study infants were assessed using Bayley Scales of Infant Development (BSID), from  
509 which the Mental Developmental Index (MDI) and Psychomotor Development Index (PDI)  
510 were derived (63). Small but statistically significant effects of the diet on the MDI scores  
511 were seen for infants 6 months or older. Breastfed infants had significantly higher scores  
512 than soy fed infants at ages 6, 9, and 12 months and significantly higher scores than cow-  
513 based milk fed infants at ages 9 and 12 months. Although these effects reached statistical  
514 significance, the MDI scores were within the expected normal range, and the differences  
515 were very small. Significant effects of the diet on the PDI scores were transient. Soy fed  
516 infants had significantly lower PDI scores, although small, compared with breastfed infants,  
517 and seen only at 6 months. Furthermore, infants were also assessed with the Preschool  
518 Language Scale-3 (PLS-3) by using the expressive communication and auditory  
519 comprehension subscales. In PLS-3, only cow-based milk fed infants had significantly lower  
520 scores compared with breastfed infants at ages 3 and 6 months, but again all groups were  
521 inside the normal range (63).

522 Ostrom *et al.*, also observed the immune status of infants fed with soy-based formulas and  
523 human milk/infant formula feed infants (64,65). In this study infants were immunized against  
524 *Haemophilus influenzae* type b polysaccharide, diphtheria toxoid, tetanus toxoid, and oral  
525 poliovirus of children and their responses evaluated at 6, 7 and 12 months of age. Antibodies  
526 against *H. influenzae* type b at 7 and 12 months were higher significantly higher in infants  
527 fed with soy-based milk (65). In contrast, human milk/infant formula fed infants had higher  
528 poliovirus neutralizing antibodies at 12 months of age. Serum IgG and IgA levels were  
529 similar between groups as well as morbidity through the first year of life. Only physician-  
530 reported diarrhea was different between groups fed with human milk/infant formula having



531 less cases than the soy group (65). Latter Cordle et al., with the same cohort showed that  
532 the number and percentage of B, T and NK lymphocytes were within age-related normal  
533 ranges with minor differences between soy formula and human milk/infant formula fed  
534 infants (64) . Overall, no differences were detected between the two groups due to soy-  
535 based formulas consumption suggesting normal immune system development.

536

## 537 **5. Conclusions and future perspectives**

538 In this literature search we have listed the (poly)phenols and their metabolites, namely  
539 flavonoids, ellagic acids and phenolics detected in human breast milk. Nonetheless, the  
540 information available in the literature about the presence of (poly)phenols and/or their  
541 metabolites reported in human breast milk is still in its infancy and requires further studies.  
542 Many (poly)phenols and their metabolites have been detected in human circulation (26), yet  
543 their presence in human milk have not been fully explored, due to several factors mentioned  
544 before. Meanwhile, several nuances in the design of the studies performed may be hindering  
545 the identification and their quantification in breast milk such as the timepoint of collection,  
546 volume, extraction and method of quantification that may still require further optimizations.

547 Concentrations of some (poly)phenol and their metabolites in human breast milk may be  
548 dependent on the diet of the mother, demonstrated by some intervention studies using  
549 (poly)phenols rich foods or the stratification of volunteers. This type of pattern has also been  
550 observed, with an increase in sugar and fat in human breast milk after mother ingested  
551 sugar and fat enriched diets (66). The type of milk (colostrum, transitional or mature) did not  
552 seem to make an impact in the quantification of some (poly)phenols. Several factors may still  
553 require further investigation such as mother's interindividual differences (genetic, metabolic,  
554 microbiota) or even variations caused by the circadian rhythm on breast milk composition  
555 (66). In fact, most studies have not reported the time of collection and volume of breast milk,  
556 which may be a big limitation, as milk production and composition may vary according to the

557 mothers and child dietary needs across the day. Some of the mentioned studies have  
558 managed this issue by assuring the collection of the full content of breast milk, choosing a  
559 specific time of the day for collection of all volunteers. Notwithstanding, information on how  
560 (poly)phenol composition varies on breast milk during the day is still nonexistent.  
561 Additionally, most studies have used small sample sizes that may overlook interindividual  
562 differences. Further studies addressing these issues may give a better insight on the  
563 presence of (poly)phenols and/or their metabolites in human breast milk and the impact of  
564 diets like the Mediterranean diet, vegetarian diet or vegan diets on the compounds present in  
565 human milk.

566 The studies on the potential health benefits to the infant of mother's (poly)phenols  
567 consumption and their presence in breast milk have been limited. The anti-oxidative  
568 properties of breast milk as function of total (poly)phenols have been performed, yet these  
569 should be looked has rather rough indicators. Measurement of general markers of  
570 antioxidant status, such as ORAC, TRAP, FRAP and TEAC are inappropriate methods for  
571 clinical studies because of the broad range of compounds (e.g., uric acid, albumin) that may  
572 interfere with the results of these analyses (67,68). More suitable markers for the increased  
573 cellular antioxidant potential may include nuclear Nrf-2 DNA binding capacity and NQO1  
574 protein levels, which were observed to increase following (poly)phenol intake and not  
575 following a challenge meal alone (69).

576 The presence of phytoestrogens like isoflavones in human breast milk has been studied due  
577 to their potential to mimic estrogens. Several studies have focused on the comparison  
578 between human breast milk and soy-based infant formulas rich in isoflavones. Nonetheless,  
579 no clear conclusion has been reached about the potential health benefit of soy-based milk.  
580 Although (poly)phenols have been known for their anti-inflammatory properties, until now  
581 only one study has focused on the immunity of the infant and the presence of (poly)phenols  
582 in the breast milk (64). Newborns and especially pre-term infants can suffer from severe  
583 inflammatory conditions yet our knowledge of (poly)phenols impact in these conditions is

584 lacking as this study has never been addressed. Overall, there are clear gaps in our current  
585 knowledge concerning what metabolites from dietary (poly)phenols appear in human breast  
586 milk and their quantification. Moreover, this hampers our understanding of their potential  
587 health benefits for the infant. At the present date the scientific data on the health potential of  
588 (poly)phenols in adults is vast, yet very little is known about their effect in infants that  
589 received them through milk. It will be important to design studies that make it possible to  
590 relate the milk composition in (poly)phenol metabolites with infant's health outcomes. Our  
591 understanding of the potential health benefits of mother's diets rich in (poly)phenols for the  
592 newborn have a huge potential to help clinicians to deal with such a fragile phase of life of  
593 infants with health complications. This will open a new way for the mothers to provide the  
594 conditions for a strong and healthy growth of their child.

595

## 596 **6. Acknowledgments**

597 The authors gratefully acknowledge the support given by Doctor Teresa Costa regarding the  
598 literature search process. This work has received funding from the European Research  
599 Council (ERC) under the European Union's Horizon 2020 research and innovation program  
600 under grant agreement No 804229. INOVA4Health Research Unit (LISBOA-01-0145-  
601 FEDER-007344). Authors would also like to acknowledge FCT for financial support of D.C.  
602 (2020.04630.BD).

603

## 604 **7. Author contributions**

605 **Diogo Carregosa:** Conceptualization; Data curation; Formal analysis; Investigation;  
606 Methodology; Resources; Software; Visualization; Writing – original draft. **Inês P. Silva:**  
607 Data curation; Formal analysis; Investigation; Methodology; Resources; Software;  
608 Visualization; Writing – original draft. **Carolina Teixeira:** Data curation; Formal analysis;  
609 Investigation; Methodology; Resources; Software; Visualization; Writing – original draft.

610 **Mariana Baltazar**: Data curation; Formal analysis; Investigation; Methodology; Resources;  
611 Software; Visualization; Writing – original draft. **Rocio García-Villalba**: Formal analysis;  
612 Supervision; Validation; Visualization; Writing – original draft; Writing – review & editing.  
613 **Filipa Soares Vieira**: Validation; Visualization; Writing – review & editing. **Mónica Marçal**:  
614 Validation; Visualization; Writing – review & editing. **Madalena Tuna**: Formal analysis;  
615 Supervision; Validation; Visualization; Writing – original draft; Writing – review &  
616 editing. **Cláudia Nunes dos Santos**: Conceptualization; Data curation; Formal analysis;  
617 Project administration; Supervision; Writing – review & editing

618

## 619 **8. References**

- 620 1. Cortez MV, Soria EA. The Effect of Freeze-Drying on the Nutrient, Polyphenol, and  
621 Oxidant Levels of Breast Milk. *Breastfeeding Medicine*. Mary Ann Liebert Inc.; 2016. p.  
622 551–4.
- 623 2. Lu Z, Chan Y-T, Lo KK-H, Wong VW-S, Ng Y-F, Li S-Y, Ho W-W, Wong M-S, Zhao D.  
624 Levels of polyphenols and phenolic metabolites in breast milk and their association  
625 with plant-based food intake in Hong Kong lactating women. *Food Funct*  
626 2021;12:12683–95.
- 627 3. Collado MC, Delgado S, Maldonado A, Rodríguez JM. Assessment of the bacterial  
628 diversity of breast milk of healthy women by quantitative real-time PCR. *Lett Appl*  
629 *Microbiol* 2009;48:523–8.
- 630 4. Valls-Bellés V, Abad C, Hernández-Aguilar MT, Nacher A, Guerrero C, Baliño P, Romero  
631 FJ, Muriach M. Human Milk Antioxidative Modifications in Mastitis: Further Beneficial  
632 Effects of Cranberry Supplementation. *Antioxidants* 2021;11:51.

- 633 5. Geneva: World Health Organization. Guideline: Counselling of women to improve  
634 breastfeeding practices . Licence: CC BY-NC-SA 30 IGO 2018;
- 635 6. Lorenzetti S, Plösch T, Teller IC. Antioxidative Molecules in Human Milk and  
636 Environmental Contaminants. *Antioxidants* 2021;10:550.
- 637 7. Pillay J, Davis TJ. *Physiology, Lactation*. 2022.
- 638 8. Ríos J, Valero-Jara V, Thomas-Valdés S. Phytochemicals in breast milk and their  
639 benefits for infants. *Critical Reviews in Food Science and Nutrition*. Bellwether  
640 Publishing, Ltd.; 2021.
- 641 9. Sánchez-Hernández S, Esteban-Muñoz A, Samaniego-Sánchez C, Giménez-Martínez R,  
642 Miralles B, Olalla-Herrera M. Study of the phenolic compound profile and antioxidant  
643 activity of human milk from Spanish women at different stages of lactation: A  
644 comparison with infant formulas. *Food Research International* 2021;141:110149.
- 645 10. Ríos J, Valero-Jara V, Thomas-Valdés S. Phytochemicals in breast milk and their  
646 benefits for infants. *Crit Rev Food Sci Nutr* 2022;62:6821–36.
- 647 11. Tsopmo A. Phytochemicals in Human Milk and Their Potential Antioxidative  
648 Protection. *Antioxidants* 2018;7:32.
- 649 12. Slavin JL. Phytoestrogens in breast milk--another advantage of breast-feeding? *Clin*  
650 *Chem* 1996;42:841–2.
- 651 13. del Rio D, Rodriguez-Mateos A, Spencer JPE, Tognolini M, Borges G, Crozier A. Dietary  
652 (Poly)phenolics in Human Health: Structures, Bioavailability, and Evidence of  
653 Protective Effects Against Chronic Diseases. *Antioxid Redox Signal* [Internet] Mary Ann  
654 Liebert Inc; 2013;18:1818–92. Available from:  
655 <http://www.liebertpub.com/doi/10.1089/ars.2012.4581>

- 656           14.    Song BJ, Jouni ZE, Ferruzzi MG. Assessment of phytochemical content in human milk  
657                           during different stages of lactation. *Nutrition* 2013;29:195–202.
- 658           15.    Hussain T, Tan B, Yin Y, Blachier F, Tossou MCB, Rahu N. Oxidative Stress and  
659                           Inflammation: What Polyphenols Can Do for Us? *Oxid Med Cell Longev* 2016;2016:1–  
660                           9.
- 661           16.    Carregosa D, Mota S, Ferreira S, Alves-Dias B, Loncarevic-Vasiljkovic N, Crespo CL,  
662                           Menezes R, Teodoro R, Santos CN dos. Overview of Beneficial Effects of (Poly)phenol  
663                           Metabolites in the Context of Neurodegenerative Diseases on Model Organisms.  
664                           *Nutrients* 2021;13:2940.
- 665           17.    Raimundo AF, Félix F, Andrade R, García-Conesa M-T, González-Sarrías A, Gilsa-Lopes  
666                           J, do Ó D, Raimundo A, Ribeiro R, Rodriguez-Mateos A, et al. Combined effect of  
667                           interventions with pure or enriched mixtures of (poly)phenols and anti-diabetic  
668                           medication in type 2 diabetes management: a meta-analysis of randomized controlled  
669                           human trials. *Eur J Nutr* 2020;59:1329–43.
- 670           18.    Zhou Y, Zheng J, Li Y, Xu D-P, Li S, Chen Y-M, Li H-B. Natural Polyphenols for Prevention  
671                           and Treatment of Cancer. *Nutrients* 2016;8:515.
- 672           19.    Santos CN, Gomes A, Oudot C, Dias-Pedroso D, Rodriguez-Mateos A, Vieira HLA,  
673                           Brenner C. Pure Polyphenols Applications for Cardiac Health and Disease. *Curr Pharm*  
674                           *Des* 2018;24:2137–56.
- 675           20.    García-Villalba R, Giménez-Bastida JA, Cortés-Martín A, Ávila-Gálvez MÁ,  
676                           Tomás-Barberán FA, Selma MV, Espín JC, González-Sarrías A. Urolithins: a  
677                           Comprehensive Update on their Metabolism, Bioactivity, and Associated Gut  
678                           Microbiota. *Mol Nutr Food Res* 2022;66:2101019.

- 679           21.    Carregosa D, Carecho RM, Figueira I, Santos CN. Low molecular weight metabolites  
680                    from polyphenols as effectors for attenuating neuroinflammation. *J Agric Food Chem*  
681                    [Internet] 2019;acs.jafc.9b02155. Available from:  
682                    <http://pubs.acs.org/doi/10.1021/acs.jafc.9b02155>
- 683           22.    Crespy V, Morand C, Besson C, Manach C, Demigne C, Remesy C. Quercetin, but not Its  
684                    Glycosides, Is Absorbed from the Rat Stomach. *J Agric Food Chem* 2002;50:618–21.
- 685           23.    Passamonti S, Vrhovsek U, Vanzo A, Mattivi F. The stomach as a site for anthocyanins  
686                    absorption from food <sup>1</sup>. *FEBS Lett* 2003;544:210–3.
- 687           24.    Talavéra S, Felgines C, Texier O, Besson C, Lamaison J-L, Rémésy C. Anthocyanins Are  
688                    Efficiently Absorbed from the Stomach in Anesthetized Rats. *J Nutr* 2003;133:4178–82.
- 689           25.    Piskula MK, Yamakoshi J, Iwai Y. Daidzein and genistein but not their glucosides are  
690                    absorbed from the rat stomach. *FEBS Lett* 1999;447:287–91.
- 691           26.    Carregosa D, Pinto C, Ávila-Gálvez MÁ, Bastos P, Berry D, Santos CN. A look beyond  
692                    dietary (poly)phenols: The low molecular weight phenolic metabolites and their  
693                    concentrations in human circulation. *Compr Rev Food Sci Food Saf* 2022;21:3931–62.
- 694           27.    Tomás-Barberán FA, García-Villalba R, González-Sarrías A, Selma M v., Espín JC. Ellagic  
695                    Acid Metabolism by Human Gut Microbiota: Consistent Observation of Three Urolithin  
696                    Phenotypes in Intervention Trials, Independent of Food Source, Age, and Health  
697                    Status. *J Agric Food Chem* 2014;62:6535–8.
- 698           28.    Mena P, Bresciani L, Brindani N, Ludwig IA, Pereira-Caro G, Angelino D, Llorach R,  
699                    Calani L, Brighenti F, Clifford MN, et al. Phenyl- $\gamma$ -valerolactones and phenylvaleric  
700                    acids, the main colonic metabolites of flavan-3-ols: synthesis, analysis, bioavailability,  
701                    and bioactivity. *Nat Prod Rep* [Internet] Royal Society of Chemistry ({RSC}); 2019;  
702                    Available from: <http://xlink.rsc.org/?DOI=C8NP00062J>

- 703 29. Heinonen S-M, Hoikkala A, Wähälä K, Adlercreutz H. Metabolism of the soy  
704 isoflavones daidzein, genistein and glycitein in human subjects. *J Steroid Biochem Mol*  
705 *Biol* [Internet] Elsevier {BV}; 2003;87:285–99. Available from:  
706 <https://linkinghub.elsevier.com/retrieve/pii/S096007600300414X>
- 707 30. Tomás-Barberán FA, González-Sarrías A, García-Villalba R, Núñez-Sánchez MA, Selma  
708 M v., García-Conesa MT, Espín JC. Urolithins, the rescue of “old” metabolites to  
709 understand a “new” concept: Metabotypes as a nexus among phenolic metabolism,  
710 microbiota dysbiosis, and host health status. *Mol Nutr Food Res* 2017;61:1500901.
- 711 31. Rothwell JA, Perez-Jimenez J, Neveu V, Medina-Remon A, M’Hiri N, Garcia-Lobato P, Manach  
712 C, Knox C, Eisner R, Wishart DS, et al. Phenol-Explorer 3.0: a major update of the Phenol-  
713 Explorer database to incorporate data on the effects of food processing on polyphenol  
714 content. *Database* [Internet] Oxford University Press ({OUP}); 2013;2013. Available from:  
715 <https://academic.oup.com/database/article-lookup/doi/10.1093/database/bat070>
- 716 32. da Silva A, Giacomoni F, Pavot B, Fillâtre Y, Rothwell JA, Sualdea BB, Veyrat C, Garcia-Villalba  
717 R, Gladine C, Kopec R, et al. PhytoHub V1. 4: A new release for the online database dedicated  
718 to food phytochemicals and their human metabolites. *Proceedings of the 1st International*  
719 *Conference on Food Bioactivities & Health, Norwich, UK. 2016. p. 13–5.*
- 720 33. Sud M, Fahy E, Cotter D, Azam K, Vadivelu I, Burant C, Edison A, Fiehn O, Higashi R, Nair KS, et  
721 al. Metabolomics Workbench: An international repository for metabolomics data and  
722 metadata, metabolite standards, protocols, tutorials and training, and analysis tools. *Nucleic*  
723 *Acids Res* 2016;44:D463–70.
- 724 34. Wishart DS, Guo A, Oler E, Wang F, Anjum A, Peters H, Dizon R, Sayeeda Z, Tian S, Lee BL, et  
725 al. HMDB 5.0: the Human Metabolome Database for 2022. *Nucleic Acids Res* 2022;50:D622–  
726 31.



- 727 35. Zhou W, Wu H, Wang Q, Zhou X, Zhang Y, Wu W, Wang Y, Ren Z, Li H, Ling Y, et al.  
728 Simultaneous determination of formononetin, biochanin A and their active metabolites in  
729 human breast milk, saliva and urine using salting-out assisted liquid-liquid extraction and  
730 ultra high performance liquid chromatography-electrospray ionization tandem mass  
731 spectrum. *Journal of Chromatography B* 2020;1145:122108.
- 732 36. Jochum F, Alteheld B, Meinardus P, Dahlinger N, Nomayo A, Stehle P. Mothers' Consumption  
733 of Soy Drink But Not Black Tea Increases the Flavonoid Content of Term Breast Milk: A Pilot  
734 Randomized, Controlled Intervention Study. *Ann Nutr Metab* 2017;70:147–53.
- 735 37. Franke AA, Custer LJ. Daidzein and genistein concentrations in human milk after soy  
736 consumption. *Clin Chem* 1996;42:955–64.
- 737 38. Franke AA, Custer LJ, Tanaka Y. Isoflavones in human breast milk and other biological fluids.  
738 *Am J Clin Nutr* 1998;68:1466S-1473S.
- 739 39. Franke AA, Custer LJ, Wang W, Shi CY. HPLC Analysis of Isoflavonoids and Other Phenolic  
740 Agents from Foods and from Human Fluids. *Exp Biol Med* 1998;217:263–73.
- 741 40. Khymenets O, Rabassa M, Rodríguez-Palmero M, Rivero-Urgell M, Urpi-Sarda M, Tulipani S,  
742 Brandi P, Campoy C, Santos-Buelga C, Andres-Lacueva C. Dietary Epicatechin Is Available to  
743 Breastfed Infants through Human Breast Milk in the Form of Host and Microbial Metabolites.  
744 *J Agric Food Chem* 2016;64:5354–60.
- 745 41. Romaszko E, Marzec-Wróblewska U, Badura A, Buciński A. Does consumption of red  
746 grapefruit juice alter naringenin concentrations in milk produced by breastfeeding mothers?  
747 *PLoS One* 2017;12:e0185954.
- 748 42. Romaszko E, Wiczowski W, Romaszko J, Honke J, Piskula MK. Exposure of breastfed infants  
749 to quercetin after consumption of a single meal rich in quercetin by their mothers. *Mol Nutr*  
750 *Food Res* 2014;58:221–8.

- 751 43. Henning SM, Yang J, Lee R-P, Huang J, Thames G, Korn M, Ben-Nissan D, Heber D, Li Z.  
752 Pomegranate juice alters the microbiota in breast milk and infant stool: a pilot study. *Food*  
753 *Funct* 2022;13:5680–9.
- 754 44. Zhang X, Sandhu A, Edirisinghe I, Burton-Freeman B. An exploratory study of red raspberry (*Rubus idaeus* L.) (poly)phenols/metabolites in human biological samples. *Food Funct*  
755 2018;9:806–18.
- 757 45. Feliciano RP, Boeres A, Massaccesi L, Istaş G, Ventura MR, Nunes dos Santos C, Heiss C,  
758 Rodriguez-Mateos A. Identification and quantification of novel cranberry-derived plasma and  
759 urinary (poly)phenols. *Arch Biochem Biophys* [Internet] Elsevier {BV}; 2016;599:31–41.  
760 Available from: <https://linkinghub.elsevier.com/retrieve/pii/S0003986116300145>
- 761 46. Cortés-Martín A, García-Villalba R, García-Mantrana I, Rodríguez-Varela A, Romo-Vaquero M,  
762 Collado MC, Tomás-Barberán FA, Espín JC, Selma MV. Urolithins in Human Breast Milk after  
763 Walnut Intake and Kinetics of *Gordonibacter* Colonization in Newly Born: The Role of  
764 Mothers' Urolithin Metabotypes. *J Agric Food Chem* 2020;68:12606–16.
- 765 47. Henning SM, Wallenstein MB, Weigel N, Johnson C, Yang J, Lee R-P. Appearance of Ellagic  
766 Acid Metabolites from Pomegranate Juice in Breast Milk: A Case Report. *Ann Clin Case Rep*  
767 2019;4:1738.
- 768 48. Nalewajko-Sieliwoniuk E, Hryniewicka M, Jankowska D, Kojło A, Kamianowska M, Szczepański  
769 M. Dispersive liquid–liquid microextraction coupled to liquid chromatography tandem mass  
770 spectrometry for the determination of phenolic compounds in human milk. *Food Chem*  
771 2020;327:126996.
- 772 49. Pinto P, Santos CN. Worldwide (poly)phenol intake: assessment methods and identified gaps.  
773 *Eur J Nutr* 2017;56:1393–408.

- 774 50. Williamson G, Manach C. Bioavailability and bioefficacy of polyphenols in humans. II. Review  
775 of 93 intervention studies. *Am J Clin Nutr* [Internet] Oxford University Press (OUP);  
776 2005;81:243S-255S. Available from:  
777 <https://academic.oup.com/ajcn/article/81/1/243S/4607529>
- 778 51. di Pede G, Mena P, Bresciani L, Achour M, Lamuela-Raventós RM, Estruch R, Landberg R,  
779 Kulling SE, Wishart D, Rodriguez-Mateos A, et al. Revisiting the bioavailability of flavan-3-ols  
780 in humans: A systematic review and comprehensive data analysis. *Mol Aspects Med*  
781 2023;89:101146.
- 782 52. Ludwig IA, Mena P, Calani L, Borges G, Pereira-Caro G, Bresciani L, del Rio D, Lean MEJ,  
783 Crozier A. New insights into the bioavailability of red raspberry anthocyanins and  
784 ellagitannins. *Free Radic Biol Med* 2015;89:758–69.
- 785 53. Williamson G, Kay CD, Crozier A. The Bioavailability, Transport, and Bioactivity of Dietary  
786 Flavonoids: A Review from a Historical Perspective. *Compr Rev Food Sci Food Saf*  
787 2018;17:1054–112.
- 788 54. Wang L, Halquist MS, Sweet DH. Simultaneous determination of gallic acid and gentisic acid in  
789 organic anion transporter expressing cells by liquid chromatography–tandem mass  
790 spectrometry. *Journal of Chromatography B* 2013;937:91–6.
- 791 55. Mori S, Takanaga H, Ohtsuki S, Deguchi T, Kang Y-S, Hosoya K, Terasaki T. Rat Organic Anion  
792 Transporter 3 (rOAT3) is Responsible for Brain-to-Blood Efflux of Homovanillic Acid at the  
793 Abluminal Membrane of Brain Capillary Endothelial Cells. *Journal of Cerebral Blood Flow &*  
794 *Metabolism* 2003;23:432–40.
- 795 56. Poniedziałek B, Rzymiski P, Pięt M, Gąsecka M, Stroińska A, Niedzielski P, Mleczek M, Rzymiski  
796 P, Wilczak M. Relation between polyphenols, malondialdehyde, antioxidant capacity, lactate

- 797 dehydrogenase and toxic elements in human colostrum milk. *Chemosphere* 2018;191:548–  
798 54.
- 799 57. Li W, Hosseinian FS, Tsopmo A, Friel JK, Beta T. Evaluation of antioxidant capacity and aroma  
800 quality of breast milk. *Nutrition* 2009;25:105–14.
- 801 58. Silberstein T, Hamou B, Cervil S, Barak T, Burg A, Saphier O. Colostrum of Preeclamptic  
802 Women Has a High Level of Polyphenols and Better Resistance to Oxidative Stress in  
803 Comparison to That of Healthy Women. *Oxid Med Cell Longev* 2019;2019:1–5.
- 804 59. Vitale DC, Piazza C, Melilli B, Drago F, Salomone S. Isoflavones: estrogenic activity, biological  
805 effect and bioavailability. *Eur J Drug Metab Pharmacokinet* 2013;38:15–25.
- 806 60. Setchell KD, Zimmer-Nechemias L, Cai J, Heubi JE. Isoflavone content of infant formulas and  
807 the metabolic fate of these phytoestrogens in early life. *Am J Clin Nutr* 1998;68:1453S-1461S.
- 808 61. Rosa F, Mercer KE, Lin H, Sims CR, Pack LM, Goode G, Badger T, Andres A, Yeruva L. Early  
809 Infant Formula Feeding Impacts Urinary Metabolite Profile at 3 Months of Age. *Nutrients*  
810 2020;12:3552.
- 811 62. Vandenplas Y, Castrellon PG, Rivas R, Gutiérrez CJ, Garcia LD, Jimenez JE, Anzo A, Hegar B,  
812 Alarcon P. Safety of soya-based infant formulas in children. *British Journal of Nutrition*  
813 2014;111:1340–60.
- 814 63. Andres A, Cleves MA, Bellando JB, Pivik RT, Casey PH, Badger TM. Developmental Status of 1-  
815 Year-Old Infants Fed Breast Milk, Cow’s Milk Formula, or Soy Formula. *Pediatrics*  
816 2012;129:1134–40.
- 817 64. Cordle CT;, Winship TR;, Schaller JP;, Thomas DJ\*;, Buck RH;, Ostrom KM;, Jacobs JR;, Blatter  
818 MM;, Cho S, Gooch WMI, et al. Immune Status of Infants Fed Soy-Based Formulas With or  
819 Without Added Nucleotides for 1 Year: Part 2: Immune Cell Populations. *J Pediatr*  
820 *Gastroenterol Nutr* 2002;34:145–53.

- 821 65. Ostrom KM, Cordle CT, Schaller JP, Winship TR, Thomas DJ, Jacobs JR, Blatter MM, Cho S,  
822 Gooch WM, Granoff DM, et al. Immune Status of Infants Fed Soy-Based Formulas With or  
823 Without Added Nucleotides for 1 Year: Part 1: Vaccine Responses, and Morbidity. *J Pediatr*  
824 *Gastroenterol Nutr* 2002;34:137–44.
- 825 66. Ward E, Yang N, Muhlhausler BS, Leghi GE, Netting MJ, Elmes MJ, Langley-Evans SC. Acute  
826 changes to breast milk composition following consumption of high-fat and high-sugar meals.  
827 *Matern Child Nutr* 2021;17.
- 828 67. Williamson G. Reporting of plasma antioxidant activities in human intervention studies in the  
829 *British Journal of Nutrition*. *British Journal of Nutrition* 2019;122:721–2.
- 830 68. Harnly J. Antioxidant methods. *Journal of Food Composition and Analysis* 2017;64:145–6.
- 831 69. Ghanim H, Sia CL, Korzeniewski K, Lohano T, Abuaysheh S, Marumganti A, Chaudhuri A,  
832 Dandona P. A Resveratrol and Polyphenol Preparation Suppresses Oxidative and  
833 Inflammatory Stress Response to a High-Fat, High-Carbohydrate Meal. *J Clin Endocrinol*  
834 *Metab* 2011;96:1409–14.
- 835 70. Min J, Wang Z, Liang C, Li W, Shao J, Zhu K, Zhou L, Cheng J, Luo S, Yu L, et al.  
836 Detection of Phytoestrogen Metabolites in Breastfed Infants' Urine and the  
837 Corresponding Breast Milk by Liquid Chromatography–Tandem Mass Spectrometry. *J*  
838 *Agric Food Chem* 2020;68:3485–94.
- 839
- 840

841 Table 1 – Characteristics of studies detecting and quantifying (poly)phenols in human breast milk samples of mothers undergoing dietary interventions.

842

| Diet/<br>Intervention                | Duration of<br>intervention | Sample<br>type | N              | Dietary<br>recommendations<br>and intake                                                         | Samples<br>collected<br>during<br>intervention | Time of<br>collection                                                                  | Sample<br>Treatment                                                                                  | Method of<br>detection        | (Poly)phenol detected                                                                                 | Reference |
|--------------------------------------|-----------------------------|----------------|----------------|--------------------------------------------------------------------------------------------------|------------------------------------------------|----------------------------------------------------------------------------------------|------------------------------------------------------------------------------------------------------|-------------------------------|-------------------------------------------------------------------------------------------------------|-----------|
| Dark<br>chocolate                    | Single dose                 | M              | 2              | No ingestion of<br>other coca-based<br>products                                                  | 0, 2, 4, 6, 8,<br>10 and 12h                   | Whole BM<br>content,<br>upon pre-<br>defined<br>timepoint for<br>collection.           | Acidification<br>with PO <sub>4</sub> H <sub>3</sub><br>followed by<br>SPE                           | UPLC-<br>QQQ                  | Flavan-3-ols (epicatechin<br>derivatives)<br>Phenyl-γ-valerolactones                                  | (40)      |
| 125g of red<br>raspberry             | 1 week                      | M              | 1              | -                                                                                                | 0h and 2h on<br>day 1 and<br>day 7             | -                                                                                      | SPE                                                                                                  | UPLC-<br>QTOF<br>UPLC-<br>QQQ | Anthocyanins<br>Flavan-3-ols<br>Flavonols<br>Urolithins<br>Phenyl- γ-valerolactones<br>Phenolic acids | (44)      |
| 30g of<br>peeled<br>walnut           | 3 days                      | M              | 11<br><hr/> 27 | Avoid ellagitannin<br>containing foods<br>during the week<br>before starting the<br>intervention | 0, 24, 48,<br>and 72h<br><hr/> 72h             | Entire BM<br>content at<br>the pre-<br>defined<br>timepoint:<br>Morning<br>collection. | ACN/formic<br>acid (99:1)<br>extraction                                                              | UPLC-<br>QTOF                 | Urolithins                                                                                            | (46)      |
| 500 mL<br>soybean milk               | Single dose                 | M              | 6              | Isoflavones<br>restriction                                                                       | 0.5, 3, 6, 9,<br>12 and 24h                    | Unknown<br>amount of<br>BM at the<br>pre-defined<br>timepoint for<br>collection        | Glucuronidase<br>and sulfatase<br>ACN                                                                | UPLC-<br>Qtrap                | Isoflavones<br>(genistein/daidzein)                                                                   | (35)      |
| 250 mL of<br>red grapefruit<br>juice | Single dose                 | M              | 14             | No supplement<br>usage<br>Avoid fruits rich in<br>naringenin                                     | 0, 1, 2, 3, 4,<br>5, 6, 12, 18,<br>24 and 36h  | Entire BM<br>content at<br>the pre-<br>defined<br>timepoint for<br>collection          | Hexane<br>Pepsin in HCl<br>NaOH and<br>glucuronidase<br>and sulfatase<br>Ethyl acetate<br>extraction | HPLC-UV<br>HPLC- Q            | Flavanones (naringenin)                                                                               | (41)      |

|                                  |                                    |       |    |                                                      |                                                                                 |                                                                        |                                                                   |                     |                                                                         |      |
|----------------------------------|------------------------------------|-------|----|------------------------------------------------------|---------------------------------------------------------------------------------|------------------------------------------------------------------------|-------------------------------------------------------------------|---------------------|-------------------------------------------------------------------------|------|
| 5, 10 or 20g of roasted soybeans | Day 0 day 1 and day 3 respectively | M     | 1  | No alcohol<br>Maintained regular diet                | a                                                                               | Unknown amount of BM at the pre-defined timepoint for collection       | Glucuronidase and sulfatase<br>Ethyl acetate extraction           | HPLC-UV<br>HPLC-ECD | Isoflavones<br>(genistein/daidzein)                                     | (39) |
|                                  |                                    |       |    |                                                      |                                                                                 |                                                                        |                                                                   | HPLC-UV<br>GC-MS    | Isoflavones<br>(genistein/daidzein)                                     | (37) |
| 5, 10, and 20 g roasted soybeans | day 1 and day 3 respectively       | M, IF | 1  | No alcohol<br>Maintained regular diet                | a                                                                               | Unknown amount of BM at the pre-defined timepoint for collection       | Glucuronidase and sulfatase<br>Ethyl acetate extraction           | HPLC-UV             | Isoflavones<br>(genistein/daidzein)                                     | (38) |
| 250mL soy drink                  | Daily (in the morning) for 6 days  | M     | 18 | No consumption of flavonoid-rich beverages and foods | Day before intervention.<br>Day 3, 6 of intervention.<br>Day after intervention | 5 min after breastfeeding starts (collected in the evening at 10h a.m) | Glucuronidase and sulfatase<br>SPE                                | HPLC-ECD            | Isoflavones<br>(genistein/daidzein)                                     | (36) |
| 300mL black tea                  |                                    | M     | 18 |                                                      |                                                                                 |                                                                        |                                                                   |                     |                                                                         |      |
| 300mL water                      |                                    | M     | 8  |                                                      |                                                                                 |                                                                        |                                                                   |                     |                                                                         |      |
| Onion soup                       | Single dose                        | M     | 11 | 5-day low quercetin diet                             | 0, 3, 6, 12, 18, 24, 36, and 48 h                                               | Unknown amount of BM at the pre-defined timepoint of collection        | Hexane<br>Glucuronidase and sulfatase<br>Ethyl acetate extraction | HPLC-PDA-MS         | Flavonols<br>(Quercetin/ isorhamnetin)                                  | (42) |
| 227g of pomegranate juice        | Daily for 2 weeks                  | M     | 2  | 2 weeks washout period of low (poly)phenol diet      | Collection at day 0 and day 14 at 6 and 24 h post intake.                       | 10mL of BM at the pre-defined timepoint of collection                  | ACN<br>SPE                                                        | LC-MS/MS            | Urolithins<br>(Uro A glucuronide/<br>Dimethyl ellagic acid glucuronide) | (47) |
| 227g of pomegranate juice        | Daily for 2 weeks                  | M     | 12 | 2 weeks washout period of low (poly)phenol diet      | Collection at day 0 and day 14 at 6 and 24 h after intake.                      | Unknown amount of BM at the pre-defined timepoint of collection        | ACN<br>SPE                                                        | LC-MS/MS            | Urolithins<br>(Uro A glucuronide/<br>Dimethyl ellagic acid glucuronide) | (43) |

843 BM- Breast Milk, C- Colostrum, T- Transitional Milk, M- Mature Milk, IF- infant formula, ACN-acetonitrile, SPE- solid phase extraction, LC- Liquid  
844 chromatography, HPLC- High performance liquid chromatography, UPLC/UHPLC- Ultra performance liquid chromatography, PDA- photodiode array  
845 detector, ECD- electrochemical detector, UV- ultraviolet, GC- Gas chromatography, PO<sub>4</sub>H<sub>3</sub> – phosphoric acid  
846 <sup>a</sup> The three articles mentioned share the same experimental design. Exact sampling timepoints are not mentioned in text yet are shown in graph.  
847 Notwithstanding, exact timepoint of collection could not be extracted from the graphs.  
848

849

850

851

852

853

854

855

856

857

858



859 Table 2- Characteristics of studies detecting and quantifying (poly)phenols in human breast milk samples of free-living mothers.

| Criteria for participation                      | Dietary recall or FFQ                                                                            | Sample type                      | No volunteers                                                        | Samples collected during intervention                                                                              | Time of collection                                                    | Sample Treatment                                                                                           | Method of detection | (poly)phenol detected                                  | Reference |
|-------------------------------------------------|--------------------------------------------------------------------------------------------------|----------------------------------|----------------------------------------------------------------------|--------------------------------------------------------------------------------------------------------------------|-----------------------------------------------------------------------|------------------------------------------------------------------------------------------------------------|---------------------|--------------------------------------------------------|-----------|
| Adherence to Mediterranean Diet. (based on FFQ) | FFQ                                                                                              | C, T, M, IF                      | C: 7 <sup>a</sup><br>T: 7 <sup>a</sup><br>M: 7 <sup>a</sup><br>IF: 7 | C: up to 5 <sup>th</sup> day<br>T: 6 <sup>th</sup> - 15 <sup>th</sup> day<br>M: > 15 <sup>th</sup> day             | Beginning of each feeding                                             | NaOH hydrolysis<br>Hexane lipid precipitation<br>Ethyl acetate extraction                                  | UPLC-MS/MS          | Phenolic acids<br>Flavan-3-ols<br>Flavonols            | (9)       |
| -                                               | FFQ and 24h recall questionnaire in the day of sampling                                          | C, T, M                          | C: 3<br>T: 11<br>M: 10                                               | C: 1 <sup>st</sup> - 5 <sup>th</sup> day<br>T: 6 <sup>th</sup> - 15 <sup>th</sup> day<br>M: > 15 <sup>th</sup> day | 30-50mL of BM in the morning or through the day                       | Acidification with PO <sub>4</sub> H <sub>3</sub> SPE                                                      | UPLC-MS/MS          | Flavan-3-ols<br>Phenolic acids                         | (40)      |
| -                                               | -                                                                                                | C, T, M, IF (non-differentiated) | 6                                                                    | -                                                                                                                  | Pool of different timepoints                                          | NaOH hydrolysis<br>Hexane lipid precipitation<br>Ethyl acetate extraction                                  | HPLC-UV             | Phenolic acids                                         | (57)      |
| -                                               | Volunteers divided in three groups according to FFQ: Low, medium, and higher (poly)phenol intake | M                                | 30 volunteers for high and medium intake and 29 for low intake       | Between 2 and 24 months                                                                                            | Entire BM content. All participant sample at the same time of the day | Hexane<br>Acidified and treated with glucuronidase<br>Ethyl acetate extraction                             | UHPLC-MS/MS         | Flavan-3-ols<br>Flavonols<br>Flavanones<br>Isoflavones | (2)       |
| Free living                                     | -                                                                                                | T, M                             | T: 17<br>M: 17                                                       | 1, 4 13 weeks after infant birth                                                                                   | Morning between 10h and 13h                                           | Hexane<br>Pepsin in HCl<br>NaOH and glucuronidase and sulfatase<br>Ethyl acetate extraction                | HPLC-MS/MS          | Flavan-3-ols<br>Flavanones<br>Flavonols                | (14)      |
| Free living                                     | -                                                                                                | C                                | 13                                                                   | -                                                                                                                  | -                                                                     | Hexane<br>(NH <sub>4</sub> ) <sub>2</sub> SO <sub>4</sub> and ascorbic acid<br>Glucuronidase and sulfatase | LC-ESI-MS/MS        | Flavanones<br>Isoflavones<br>Phenolic                  | (48)      |

|                |                               |   |    |   |                                                       |                                                                                                  |              |             |      |
|----------------|-------------------------------|---|----|---|-------------------------------------------------------|--------------------------------------------------------------------------------------------------|--------------|-------------|------|
|                |                               |   |    |   |                                                       | treatment<br>Ethyl acetate and acetonitrile<br>extraction                                        |              | acids       |      |
| Free<br>living | FFQ and 24h<br>dietary recall | - | 50 | - | >30 mL of<br>BM in the<br>morning<br>after<br>fasting | Ethyl acetate extraction<br>Glucuronidase and sulfatase<br>treatment<br>Ethyl acetate extraction | LC-<br>MS/MS | Isoflavones | (70) |

860 BM- Breast Milk, C- Colostrum, T- Transitional Milk, M- Mature Milk, IF- infant formula, ACN-acetonitrile, SPE- solid phase extraction, LC- Liquid  
861 chromatography, HPLC- High performance liquid chromatography, UPLC/UHPLC- Ultra performance liquid chromatography, PO<sub>4</sub>H<sub>3</sub> – phosphoric acid.  
862 <sup>a</sup> Eighteen volunteers were included in each group, yet (poly)phenol quantifications were only performed to 7 of the 18 volunteers per group.  
863

864 Table 3- Dietary Flavonoids and metabolites detected in human breast milk, and their  
 865 concentrations.

| <b>Flavonoids</b>                | <b>Milk Type</b> | <b>Concentration (range) in nmol/L<sup>a</sup></b> | <b>Reference</b>  |
|----------------------------------|------------------|----------------------------------------------------|-------------------|
| <b>Anthocyanins</b>              |                  |                                                    |                   |
| Cyanidin-3-sophoroside           | M                | R.Q.                                               | (44)              |
| Cyanidin-3-2G-glucosylrutinoside | M                | R.Q.                                               | (44)              |
| Cyanidin-3-glucoside             | M                | R.Q.                                               | (44)              |
| Pelargonidin-3-sophoroside       | M                | R.Q.                                               | (44)              |
| Cyanidin-3-rutinoside            | M                | R.Q.                                               | (44)              |
| Cyanidin-3-glucuronide           | M                | R.Q.                                               | (44)              |
| Methylcyanidin-3-sophoroside     | M                | R.Q.                                               | (44)              |
| Peonidin-3-glucoside             | M                | R.Q.                                               | (44)              |
| <b>Flavonols</b>                 |                  |                                                    |                   |
| Quercetin                        | M                | 150 <sup>c</sup>                                   | (2) <sup>f</sup>  |
|                                  | T                | 48.1 (40.0-77.6)                                   | (14) <sup>f</sup> |
|                                  | M                | 59.8 (33.1-108.6) <sup>e</sup>                     |                   |
|                                  | M                | 68 <sup>b</sup>                                    | (42) <sup>f</sup> |
|                                  | C                | 105.22 (100.59 – 109.52) <sup>d</sup>              | (48) <sup>f</sup> |
| Isoquercetin                     | C                | 0.11 (0.06-0.15)                                   | (9)               |
|                                  | T                | 0.19 (0.08-0.21)                                   |                   |
|                                  | M                | 0.16 (0.06-0.25)                                   |                   |
| Kaempferol                       | M                | 30 <sup>c</sup>                                    | (2) <sup>f</sup>  |
|                                  | T                | 15.7 (7.8-34)                                      | (14) <sup>f</sup> |
|                                  | M                | 34.8 (17.7-71.4) <sup>e</sup>                      |                   |
| Kaempferol-3-glucoside           | C                | 2.36 (0-7.08)                                      | (9)               |
|                                  | T                | 3.02 (0.01-5.24)                                   |                   |
|                                  | M                | -                                                  |                   |
| <b>Flavan-3-ols</b>              |                  |                                                    |                   |
| Catechin                         | C                | 0.04 (0.02-0.05)                                   | (9)               |
|                                  | T                | 0.02 (0.01-0.03)                                   |                   |
|                                  | M                | 0.29 (0.08-0.42)                                   |                   |
| Catechin-glucuronide             | M                | R.Q.                                               | (44)              |
| Epicatechin                      | M                | 5.4 <sup>c</sup>                                   | (2) <sup>f</sup>  |
|                                  | M                | 33 <sup>c</sup>                                    | (2) <sup>f</sup>  |
|                                  | T                | 90.5 (68.3-120.5)                                  | (14)              |
| Epicatechin-4-glucuronide        | M                | 249.2(63.7-828.5) <sup>e</sup>                     |                   |
|                                  | C, T             | 38 <sup>b</sup>                                    | (40)              |
|                                  | T, M             | 26 <sup>b</sup>                                    | (40)              |
| Methylepicatechin-3-sulfate      | C, T, M          | 26 <sup>b</sup>                                    | (40)              |
| Epicatechin-gallate              | T                | 189.5 (55.7-609)                                   | (14) <sup>f</sup> |
|                                  | M                | 236.6 (62.2-646) <sup>e</sup>                      |                   |
| Epigallocatechin-gallate         | T                | 1119 (426-2365)                                    | (14) <sup>f</sup> |
|                                  | M                | 667 (215-1684) <sup>e</sup>                        |                   |
| <b>Isoflavones</b>               |                  |                                                    |                   |
| Daidzein                         | M                | 68 <sup>c</sup>                                    | (2) <sup>f</sup>  |
|                                  | M                | 104 <sup>b</sup>                                   | (35) <sup>f</sup> |
|                                  | M                | 60 <sup>b,d</sup>                                  | (38) <sup>f</sup> |
|                                  | M                | 9.3 <sup>b</sup>                                   | (36)              |
|                                  | M                | 55 <sup>b,d</sup>                                  | (37) <sup>f</sup> |
|                                  | C                | 14.20 (0.83-79.46) <sup>d</sup>                    | (48) <sup>f</sup> |
|                                  |                  |                                                    | 37 (20-54)        |

|                             |               |                                  |                   |
|-----------------------------|---------------|----------------------------------|-------------------|
| Genistein                   | M             | 99 <sup>b</sup>                  | (35) <sup>f</sup> |
|                             | M             | 65 <sup>b, d</sup>               | (38) <sup>f</sup> |
|                             | M             | 4.5 <sup>b</sup>                 | (36)              |
|                             | M             | 70 <sup>b, d</sup>               | (37) <sup>f</sup> |
|                             | C             | 13.43 (0.93- 44.77) <sub>d</sub> | (48) <sup>f</sup> |
| -                           | 117 (105-130) | (70) <sup>f</sup>                |                   |
| <b>Flavanone</b>            |               |                                  |                   |
| Naringenin                  | M             | 474 <sup>c</sup>                 | (2) <sup>f</sup>  |
|                             | T             | 252 (83-543)                     | (14) <sup>f</sup> |
|                             | M             | 210 (98-722) <sup>e</sup>        |                   |
|                             | M             | 908 <sup>b</sup>                 | (41) <sup>f</sup> |
|                             | C             | 6.69 (1.41-22.30) <sup>d</sup>   | (48) <sup>f</sup> |
| Hesperitin                  | T             | 459 (107-1272)                   | (14) <sup>f</sup> |
|                             | M             | 393 (80-1603) <sup>e</sup>       |                   |
|                             | C             | 4.11 (0.79-16.21) <sup>d</sup>   | (48) <sup>f</sup> |
| <b>Flavonoid metabolite</b> |               |                                  |                   |
| Equol                       | M             | 102 <sup>c</sup>                 | (2) <sup>f</sup>  |
|                             | -             | 8.000 (0.001-0.028)              | (70) <sup>f</sup> |

866 C- Colostrum, T- transitional milk, M- Mature Milk, R.Q.- Relative quantification

867

868 <sup>a</sup> The concentrations listed are the highest concentrations reported in each study or a range when  
 869 more than one concentration is presented . Studies reporting only relative quantification are  
 870 referred as R.Q (relative quantification).

871 <sup>b</sup> Studies reporting a Cmax values from a kinetic study.

872 <sup>c</sup> Highest reported concentration between the three experimental groups in the study (low, medium  
 873 and high (poly)phenol consumers).

874 <sup>d</sup> Approximate values extrapolated from the graph.

875 <sup>e</sup> Highest reported concentration between week 4 and 13 postpartum.

876 <sup>f</sup> This study reported the use of deconjugation enzymes that may impact the absolute value  
 877 reported.

878 Table 4 – Ellagic acid metabolites detected and quantified in human breast milk, and their  
 879 concentrations.

| <b>Ellagic acid metabolites</b>   | <b>Milk Type</b> | <b>Quantification</b><br>Cmax (range) in nmol/L      | <b>Reference</b> | <b>880</b> |
|-----------------------------------|------------------|------------------------------------------------------|------------------|------------|
| Dimethyl Ellagic Acid-glucuronide | M                | 1.12 <sup>c</sup>                                    | (47)             | 883        |
| Urolithin A                       | M                | 4.7 (4-5) <sup>a</sup><br>3.3 (1.4-7.8) <sup>b</sup> | (46)             | 884<br>885 |
| Urolithin A-glucuronide           | M                | 27.6 (9-78) <sup>a</sup><br>31 (10-90) <sup>b</sup>  | (46)             | 886<br>887 |
|                                   | M                | 36.28 <sup>c</sup>                                   | (43)             | 888        |
| Urolithin A-sulfate               | M                | 7.9 (7-9) <sup>a</sup><br>17.2 (7-40) <sup>b</sup>   | (46)             | 889        |
| Isourolithin A                    | M                | 2.7 (2-5) <sup>b</sup>                               | (46)             | 890        |
| Isourolithin A-glucuronide        | M                | 14.8 (6-23) <sup>b</sup>                             | (46)             | 891        |
| Urolithin B                       | M                | 4.3 <sup>b</sup>                                     | (46)             | 892        |
| Urolithin B-glucuronide           | M                | 19.8 (5-52) <sup>b</sup>                             | (46)             | 893        |
| Urolithin B-sulfate               | M                | D.Q                                                  | (46)             | 894        |

895

896 M- Mature Milk, D.Q- Detected not quantified

897 <sup>a</sup> Detected in Metabotype A

898 <sup>b</sup> Detected in Metabotype B

899 <sup>c</sup> Maximal reported Cmax between the two participants and day 1, 7 and 14 after beginning of the  
 900 intervention.

901

902 Table 5- Low molecular weight phenolics detected in human breast milk, and their concentrations.

| Phenolic Metabolite                                                          | Milk Type | Concentration (range) in nmol/L <sup>a</sup> | Reference         |
|------------------------------------------------------------------------------|-----------|----------------------------------------------|-------------------|
| <b>Benzenes</b>                                                              |           |                                              |                   |
| 1,2,3-trihydroxybenzene (pyrogallol)                                         | C         | 0.75 (0.34-1.73)                             | (9)               |
|                                                                              | T         | 0.95 (0.28-2.13)                             |                   |
|                                                                              | M         | 1.66 (1.41-3.91)                             |                   |
| <b>Benzoic acids</b>                                                         |           |                                              |                   |
| 3,4,5-trihydroxybenzoic acid (gallic acid)                                   | C         | 582 (375–721)                                | (9)               |
|                                                                              | T         | 661 (434–816)                                |                   |
|                                                                              | M         | 575 (434–816)                                |                   |
|                                                                              | M         | 61 <sup>c</sup>                              | (2) <sup>f</sup>  |
|                                                                              | M         | R.Q.                                         | (44)              |
|                                                                              | C         | 186.92 (178.70-194.57) <sup>d</sup>          | (48) <sup>f</sup> |
| 2,3-dihydroxybenzoic acid                                                    | M         | R.Q.                                         | (44)              |
| 2,5-dihydroxybenzoic acid                                                    | C         | 5.61 (4-8)                                   | (9) <sup>f</sup>  |
|                                                                              | T         | 7.41 (3-15)                                  |                   |
|                                                                              | M         | 6.43 (0.29-11)                               |                   |
| 2,6-dihydroxybenzoic acid                                                    |           | R.Q.                                         | (44)              |
| 4-hydroxy-3-methoxybenzoic acid (vanillic acid)                              | C         | 5.96 (6-7)                                   | (9) <sup>f</sup>  |
|                                                                              | T         | 7.05 (6-8)                                   |                   |
|                                                                              | M         | 6.56 (4-10)                                  |                   |
|                                                                              | M         | R.Q.                                         | (44)              |
| 3-methoxybenzoic acid-4-sulfate (vanillic acid-sulfate)                      | M         | R.Q.                                         | (44)              |
| 3-methoxybenzoic acid-4-glucuronide (vanillic acid-glucuronide)              | M         | R.Q.                                         | (44)              |
| 4-methoxy-3-hydroxybenzoic acid (Isovanillic acid)                           | M         | R.Q.                                         | (44)              |
| 4-methoxy-benzoic acid-3-sulfate (Isovanillic acid-sulfate)                  | M         | R.Q.                                         | (44)              |
| 3,4-dihydroxybenzoic acid (protocatechuic acid)                              | C         | 15.16 (5-31)                                 | (9) <sup>f</sup>  |
|                                                                              | T         | 22.55 (9-27)                                 |                   |
|                                                                              | M         | 13.16 (3-20)                                 |                   |
|                                                                              | M         | 770 <sup>c</sup>                             | (2) <sup>f</sup>  |
|                                                                              | M         | R.Q.                                         | (44)              |
| 3,4-dihydroxybenzoic acid-sulfate <sup>b</sup> (protocatechuic acid-sulfate) | M         | R.Q.                                         | (44)              |
| 2,4,6-trihydroxybenzoic acid                                                 | C         | 2.71 (1-6)                                   | (9)               |
|                                                                              | T         | 2.68 (1-4)                                   |                   |
|                                                                              | M         | 3.08 (0.25-6)                                |                   |
| 4-hydroxybenzoic acid                                                        | C         | 0.54 (0.24-0.90)                             | (9)               |
|                                                                              | T         | 0.67 (0.44-0.94)                             |                   |
|                                                                              | M         | 0.72 (0.26-1.9)                              |                   |
|                                                                              | M         | R.Q.                                         | (44)              |
|                                                                              | C, T, M   | (4445-4598) <sup>d</sup>                     | (57)              |
| benzoic acid-4-glucuronide                                                   | M         | R.Q.                                         | (44)              |
| benzoic acid-4-sulfate                                                       | M         | R.Q.                                         | (44)              |
| 3-hydroxybenzoic acid                                                        | C         | 7.66 (3-14)                                  | (9)               |
|                                                                              | T         | 9.94 (6-12)                                  |                   |
|                                                                              | M         | 6.85 (3-8)                                   |                   |
| benzoic acid-3-glucuronide                                                   | M         | R.Q.                                         | (44)              |
| methyl 4-hydroxybenzoate                                                     | M         | R.Q.                                         | (44)              |
| methyl 3,4-dihydroxybenzoate                                                 | M         | R.Q.                                         | (44)              |

| <b>Benzaldehydes</b>                                                        |            |                                      |                   |
|-----------------------------------------------------------------------------|------------|--------------------------------------|-------------------|
| 3,4-dihydroxybenzaldehyde<br>(protocatechualdehyde)                         | C          | 9.63 (3-17)                          | (9)               |
|                                                                             | T          | 12.56 (7-16)                         |                   |
|                                                                             | M          | 7.46 (3-10)                          |                   |
|                                                                             | M          | R.Q.                                 | (44)              |
| 4-hydroxybenzaldehyde<br>(p-hydroxybenzaldehyde)                            | M          | R.Q.                                 | (44)              |
|                                                                             | C          | 1.09 (1-6)                           | (9)               |
|                                                                             | T          | 3.54 (1-5)                           |                   |
|                                                                             | M          | 1.62 (0.41-3)                        |                   |
| benzaldehyde-4-glucuronide<br>(4-hydroxybenzaldehyde-glucuronide)           | M          | R.Q.                                 | (44)              |
| 4-hydroxy-3-methoxybenzaldehyde<br>(vanillin)                               | C          | 5.84 (3-9)                           | (9)               |
|                                                                             | T          | 7.83 (7-10)                          |                   |
|                                                                             | M          | 5.56 (2-10)                          |                   |
| 2-hydroxy-3-methoxybenzaldehyde<br>(o-vanillin)                             | C          | 1.61 (1.41-1.62)                     | (9)               |
|                                                                             | T          | 6.06 (6-7)                           |                   |
|                                                                             | M          | 12.22 (0.30-32)                      |                   |
| 2,4,6-trihydroxybenzaldehyde<br>(phloroglucinaldehyde)                      | M          | R.Q.                                 | (44)              |
| <b>Cinnamic Acids</b>                                                       |            |                                      |                   |
| cinnamic acid<br>(coumaric acid)                                            | M          | R.Q.                                 | (44)              |
| 4'-hydroxy-3'-methoxycinnamic acid<br>(ferulic acid)                        | C          | 0.62 (0.06-1.23)                     | (9)               |
|                                                                             | T          | 0.71 (0.12-1.53)                     |                   |
|                                                                             | M          | 0.34 (0.14-0.57)                     |                   |
|                                                                             | M          | 129 <sup>c</sup>                     | (2) <sup>f</sup>  |
|                                                                             | M          | R.Q.                                 | (44)              |
|                                                                             | C, T,<br>M | (7339-7673) <sup>d</sup>             | (57)              |
| 3'-methoxycinnamic acid-4'-glucuronide<br>(ferulic acid-glucuronide)        | M          | R.Q.                                 | (44)              |
| 3',4'-dihydroxycinnamic acid<br>(caffeic acid)                              | C          | 14.15 (4-17)                         | (9)               |
|                                                                             | T          | 17.28 (4-30)                         |                   |
|                                                                             | M          | 12.32 (1-24)                         |                   |
|                                                                             | M          | 188 <sup>c</sup>                     | (2) <sup>f</sup>  |
|                                                                             | C          | 301.95 (129.32- 654.97) <sup>d</sup> | (48) <sup>f</sup> |
| 3',4'-dihydroxycinnamic acid-sulfate <sup>b</sup><br>(caffeic acid-sulfate) | M          | R.Q.                                 | (44)              |
| 4'-methoxycinnamic acid                                                     | C          | 0.24 (0.02-0.67)                     | (9)               |
|                                                                             | T          | 0.30 (0.14-0.48)                     |                   |
|                                                                             | M          | 0.91 (0.06-2.42)                     |                   |
| 3',4'-dimethoxycinnamic acid<br>(dimethylcinnamic acid)                     | C          | 0.14 (0.13-0.28)                     | (9)               |
|                                                                             | T          | 0.56 (0.15-0.25)                     |                   |
|                                                                             | M          | 0.18 (0.13-0.24)                     |                   |
| 4'-hydroxycinnamic acid<br>(p-coumaric acid)                                | C          | 0.44 (0.24-0.59)                     | (9)               |
|                                                                             | T          | 1.20 (0.27-2.31)                     |                   |
|                                                                             | M          | 0.29 (0.15-0.49)                     |                   |
|                                                                             | C, T,<br>M | (8474-8797) <sup>d</sup>             | (57)              |
| cinnamic acid-4'-sulfate<br>(p-coumaric acid-sulfate)                       | M          | R.Q.                                 | (44)              |
| <b>3-(phenyl)propanoic acids</b>                                            |            |                                      |                   |

|                                                                                               |             |                                                          |                  |
|-----------------------------------------------------------------------------------------------|-------------|----------------------------------------------------------|------------------|
| 3-(3'-methoxyphenyl)propanoic acid-4'-glucuronide<br>(dihydroferulic acid-glucuronide)        | M           | R.Q.                                                     | (44)             |
| 3'-methoxycinnamic acid-4'-sulfate<br>(dihydroferulic acid-sulfate)                           | M           | R.Q.                                                     | (44)             |
| 3-(3',4'-dihydroxyphenyl)propanoic acid-sulfate <sup>b</sup><br>(dihydrocaffeic acid-sulfate) | M           | R.Q.                                                     | (44)             |
| 3-(3'-hydroxyphenyl)propanoic acid                                                            | M           | R.Q.                                                     | (44)             |
| 3-(phenyl)propanoic acid-3'-sulfate<br>(3-(3-hydroxyphenyl)propanoic acid-sulfate)            | M           | R.Q.                                                     | (44)             |
| <b>Phenylacetic acids</b>                                                                     |             |                                                          |                  |
| 2'-hydroxyphenylacetic acid                                                                   | M           | R.Q.                                                     | (44)             |
| 3'-hydroxyphenylacetic acid                                                                   | M           | R.Q.                                                     | (44)             |
| 4'-hydroxyphenylacetic acid                                                                   | M           | R.Q.                                                     | (44)             |
| 4'-hydroxyphenylacetic acid<br>( <i>p</i> -hydroxyphenylacetic acid)                          | C<br>T<br>M | 0.27 (0.05-0.53)<br>0.41 (0.35-0.52)<br>0.40 (0.07-0.93) | (9)              |
| 3',4'-dihydroxyphenylacetic acid<br>(dopac)                                                   | M           | 277 <sup>c</sup>                                         | (2) <sup>f</sup> |
|                                                                                               | M           | R.Q.                                                     | (44)             |
| 4'-hydroxy-3'-methoxyphenylacetic acid<br>(homovanillic acid)                                 | M           | R.Q.                                                     | (44)             |
| 3'-hydroxy-4'-methoxyphenylacetic acid<br>(Isohomovanillic acid)                              | M           | R.Q.                                                     | (44)             |
| <b>5-(phenyl)-<math>\gamma</math>-valerolactone</b>                                           |             |                                                          |                  |
| 5-(3',4'-dihydroxyphenyl)- $\gamma$ -valerolactone-glucuronide (isomer 1) <sup>b</sup>        | M           | 26                                                       | (40)             |
| 5-(3',4'-dihydroxyphenyl)- $\gamma$ -valerolactone-glucuronide (isomer 2) <sup>b</sup>        | C<br>T<br>M | 37<br>(22-39)<br>(19-39)                                 | (40)             |
| 5-(3',4'-dihydroxyphenyl)- $\gamma$ -valerolactone-sulfate                                    | C<br>T<br>M | (165-781)<br>(24-1909)<br>(20-435)                       | (40)             |
| 5-(3'-methoxyphenyl)- $\gamma$ -valerolactone-4'-glucuronide                                  | M           | 24                                                       | (40)             |
| 5-(3'-methoxy-4'-hydroxyphenyl)- $\gamma$ -valerolactone-sulfate <sup>e</sup>                 | T<br>M      | (14-26)<br>(17-20)                                       | (40)             |
| 5-(3'-methoxy-4'-hydroxyphenyl)- $\gamma$ -valerolactone-sulfate <sup>e</sup>                 | C<br>T<br>M | 20<br>20<br>17 (16.9-17.2)                               | (40)             |
| 5-(3',4',5'-trihydroxyphenyl)- $\gamma$ -valerolactone                                        | M           | R.Q.                                                     | (44)             |
| 5-(4'-hydroxyphenyl)- $\gamma$ -valerolactone-3'-glucuronide                                  | M           | R.Q.                                                     | (44)             |
| 5-(3',4'-dihydroxyphenyl)- $\gamma$ -valerolactone-sulfate <sup>b</sup>                       | M           | R.Q.                                                     | (44)             |
| <b>Hippuric Acids</b>                                                                         |             |                                                          |                  |
| hippuric Acid                                                                                 | M           | R.Q.                                                     | (44)             |
| <b>Chlorogenic acids</b>                                                                      |             |                                                          |                  |



---

|                  |   |                    |     |
|------------------|---|--------------------|-----|
| chlorogenic acid | C | 9.43 (0.57-26.82)  | (9) |
|                  | T | 17.72 (2.39-40.02) |     |
|                  | M | 1.03 (0.01-2.61)   |     |

---

903 C- Colostrum, T- transitional milk, M- Mature Milk, R.Q.- Relative quantification

904 <sup>a</sup> The concentrations listed are the highest concentrations reported in each study or a range when  
905 more than one concentration is presented. Studies reporting only relative quantification are referred  
906 as R.Q (relative quantification).<sup>b</sup> The concentration reflects the sum of two possible isomers;

907 <sup>c</sup> Highest reported concentration between the three experimental groups in the study (low, medium,  
908 and high (poly)phenol consumers);

909 <sup>d</sup> Converted from  $\mu\text{g/L}$  to  $\text{nmol/L}$ ;

910 <sup>e</sup> The original manuscript states two sulfate isomers for “5-(3-methoxy-4-hydroxyphenyl)- $\gamma$ -  
911 valerolactone-sulfate”. However, this molecule only has one hydroxyl group available for sulfation.  
912 For this reason, it is possible that the isomers mentioned in the original manuscript are 5-(3-  
913 methoxyphenyl)- $\gamma$ -valerolactone-4-sulfate and 5-(4-methoxyphenyl)- $\gamma$ -valerolactone-3-sulfate.

914

915

916

917

918

919

920

921

922
